# Supplementary material for: Screened exchange hybrid density functional for accurate and efficient structures and interaction energies
Source: Royal Society of Chemistry journal article supplement (doi:10.1039/c6cp01697a), 2016-01-01
Supplement: c6cp01697a2.zip [file c6cp01697a2.zip]

## Screened exchange hybrid density functional for accurate and efficient structures and interaction energies

Jan Gerit Brandenburg,<sup>1, a)</sup> Eike Caldeweyher,<sup>2</sup> and Stefan Grimme<sup>2, b)</sup>

<sup>1)</sup>*Department of Chemistry, University College London, 20 Gordon Street, London, United Kingdom. Fax: +44 207679 7463; Tel: +44 207679 4622*

<sup>2)</sup>*Mulliken Center for Theoretical Chemistry, University of Bonn, Berlingstr. 4-6, 53115 Bonn, Germany. Fax: +49 228 739064; Tel: +49 228 732351*

(Dated: 16 May 2016)

---

<sup>a)</sup>Electronic mail: gerit.brandenburg@thch.uni-bonn.de

<sup>b)</sup>Electronic mail: grimme@thch.uni-bonn.de

## Supporting Information

---

|                                             |               |
|---------------------------------------------|---------------|
| HSE-3c method definition                    | Pages S3-S4   |
| HSE-3c numerical example                    | Pages S5-S6   |
| Technical Details of Benchmark Calculations | Pages S6-S7   |
| Extended statistical measures               | Pages S7-S11  |
| X23 unit cell volumes                       | Pages S12-S13 |
| X23 lattice energies                        | Pages S14-S15 |
| Adenine-thymine double helix structure      | Pages S16-S35 |

---

## A. HSE-3c definition

The HSE-3c energy can be expressed as

$$\begin{aligned}
E^{\text{HSE-3c}} &= E_{\text{xc}}^{\text{HSE-3c}} + E_{\text{disp}}^{\text{D3}} + E_{\text{BSSE}}^{\text{gCP}} \\
E_{\text{xc}}^{\text{HSE-3c}} &= a E_{\text{x}}^{\text{HF,SR}}(\omega) + (1-a) E_{\text{x}}^{\text{HSE,SR}}(\omega) + E_{\text{x}}^{\text{HSE,LR}}(\omega) + E_{\text{c}}^{\text{PBEh-3c}}.
\end{aligned} \tag{1}$$

The semilocal exchange is described by the Henderson-Janesko-Scuseria (HJS) model.<sup>1,2</sup> Its exchange enhancement factor  $F_x(s, \mathcal{H}(s))$  depends on the rational function

$$\mathcal{H}(s) = \frac{\sum_{k=2}^7 a_k s^k}{\sum_{k=1}^9 b_k s^k} \tag{2}$$

with parameter  $\{a_i, b_i\}$  and reduced density gradient  $s$ . The free parameter  $\{a_i, b_i\}$  are adjusted to reproduce closely the PBEh-3c exchange enhancement factor<sup>3,4</sup>

$$F_x^{\text{PBEh-3c}} = 1 + \kappa \frac{\mu s^2}{\kappa + \mu s^2}. \tag{3}$$

with numerical values  $\kappa = 1.0245$  and  $\mu = 10/81$ . The parametrization strategy closely follows the reference Ref.<sup>5</sup>

TABLE S1. Empirical parameters of the HSE-3c method.

|                  |                           |                      |               |               |
|------------------|---------------------------|----------------------|---------------|---------------|
| $E_{xc}$         | $a_x$                     | $\omega$             | $\beta_{PBE}$ |               |
|                  | 0.42                      | 0.11                 | 0.03          |               |
| HJS <sub>x</sub> | $a_1$                     | $a_2$                | $a_3$         | $a_4$         |
|                  | <sup>†</sup> 1.0000000000 | 0.0000008986         | 0.0822661747  | -0.1405847975 |
|                  | $a_5$                     | $a_6$                | $a_7$         | $b_1$         |
|                  | 0.1488803147              | -0.1058446440        | 0.0497445704  | 8.2051102554  |
|                  | $b_2$                     | $b_3$                | $b_4$         | $b_5$         |
|                  | -13.1479358747            | 11.7388225392        | -4.6420352940 | 1.5681751604  |
|                  | $b_6$                     | $b_7$                | $b_8$         | $b_9$         |
|                  | -0.6467545549             | 0.4096383705         | -0.0591716296 | 0.0274713086  |
| $E_{disp}$       | $s_6$                     | $s_8$                | $a_1$         | $a_2$         |
|                  | <sup>†</sup> 1.00000      | <sup>†</sup> 0.00000 | 0.44110       | 4.51820       |
| $E_{gCP}$        | $\sigma$                  | $\eta$               | $\alpha$      | $\beta$       |
|                  | <sup>†</sup> 1.00000      | 1.40858              | 0.29083       | 1.95260       |

<sup>†</sup> Constrained value.

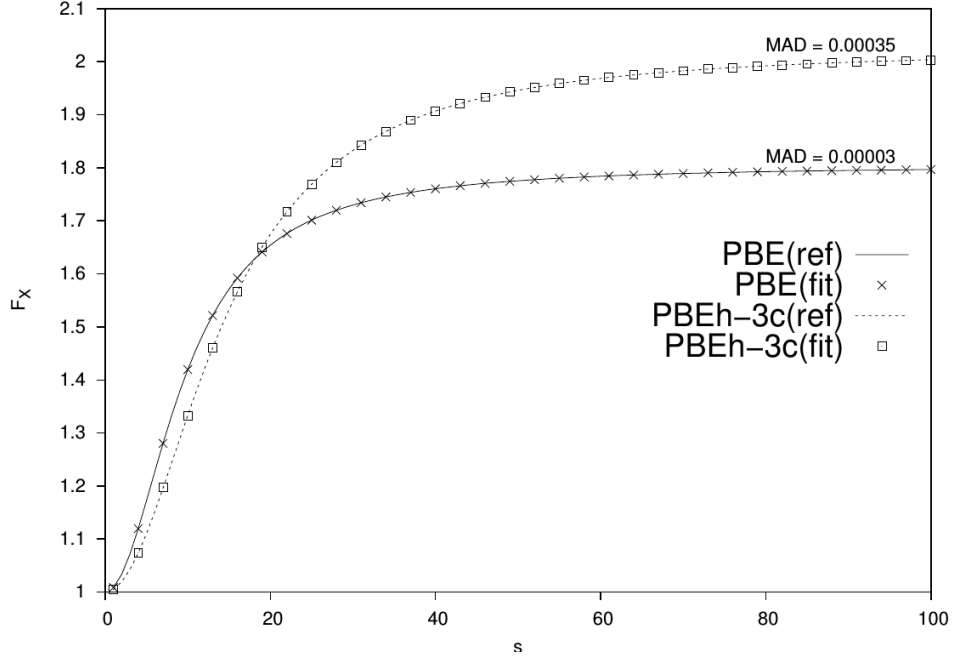

FIG. S1. Fitted HSJ enhancement factor as a function of the reduced density gradient for HSE06 and HSE-3c compared to the original PBE based reference.

In Fig. S1, we show the PBE based and fitted exchange enhancement factors. The fit has a small residual error compareable to the original HSE06 fit.

The HSE-3c exchange-correlation functional is evaluated in an unmodified small Gaussian orbital basis set of double-zeta quality. It is termed def2-mSVP as introduced in Ref. 4 and explicitly given in its ESI. Meanwhile it has been included in the TURBOMOLE7.0 and ORCA3.1 program suites. The basis set in CRYTSAL format is provided in the tarball `def2msvp.tar.gz` and will be included in the next CRYSTAL version.

## B. HSE-3c numerical example

CRYSTAL14 input examples for an HF-3c energy calculation of the benzene gas and solid phase are given below. They are intended for reproduction purposes, but also nicely show the usage of both point and space group symmetries. The calculation can be easily performed on a standard laptop and the resulting lattice energy is exceptionally close to the CCSD(T) reference of 13.2 kcal/mol.

```
!bz crystal
CRYSTAL
0 0 0
61
6.74427800429    7.30691991654    9.20995113206
6
6    0.36613211915    0.42927345151    0.40050928261
6    0.37153521385    0.36024420645    0.54092538074
6    0.49463808953    0.56843592353    0.35936193107
1    0.26045760036    0.37519728840    0.32328723077
1    0.49000991264    0.62141055688    0.24960361303
1    0.27174746575    0.25066643035    0.57135759632
BASISSET
def2-mSVP
DFT
HSE-3c
END
SHRINK
0 0
4 4 4
END
```

```
!bz gas
MOLECULE
40
2
6    1.201622903718    0.693757306926    0.000000000000
1    2.138625514345    1.234736016402    0.000000000000
BASISSET
def2-mSVP
DFT
HSE-3c
END
END
```

The different energy contributions are summarized in Table S2. Different numerical integration grids may lead to slightly different absolute energies. However, the relative energies should be less sensitive.

TABLE S2. Total and relative energies of HSE-3c for the gas and solid phase of benzene.

|               | gas [a.u.]      | solid [a.u.]    | relative [kcal/mol] |
|---------------|-----------------|-----------------|---------------------|
| HSE/def2-mSVP | -231.7435401518 | -927.0073324188 | -5.20               |
| D3            | -0.0068628129   | -0.0853526231   | -9.08               |
| gCP           | 0.0148400663    | 0.0668904983    | 1.18                |
| HSE-3c        | -231.7355628984 | -927.0257945437 | -13.11              |

### C. Technical Details of Benchmark Calculations

All calculations were carried out with a development version of CRYSTAL14.<sup>6</sup> It is the ideal choice for cost effective DFT calculations in small basis sets as it can exploit full point and space group symmetry. The Brillouin zone is sampled with a  $\Gamma$ -centered  $k$ -mesh with grid density of approximately  $0.025 \text{ \AA}^{-1}$  (for details see references<sup>7,8</sup>). Standard integral thresholds and large DFT integration grids were used. The calculation of the D3(BJ)<sup>9,10</sup> dispersion correction and the gCP BSSE correction<sup>11</sup> were carried out with our own programs `dftd3` and `gcp`, respectively. These programs are freely available from our website<sup>12</sup>. The D3 energy calculations are all performed in the rational Becke-Johnson sampling scheme and include the three-body Axillog-Teller-Muto term. The basis sets and the compound DFT keyword HSE-3c have been implemented in CRYSTAL14 and will be available in the next release. The results for the estimated CBS were taken from previous work and were conducted with a projector-augmented plane-wave (PAW<sup>13,14</sup>) basis set with large energy cutoff of 1000 eV as implemented in VASP 5.3.<sup>15,16</sup> Note that the inclusion of the three-body term and the rational damping can lead to deviations from other errors reported in the literature, e.g. for TPSS-D3 and PBE0-D3 on the GMTKN subsets.

In some cases (e.g., for anions) it is necessary to add diffuse functions for specific atoms as usual. According to some test calculations for HSE-3c it seems to be the most robust

strategy to keep the gCP parameters in this case. The gCP program prints out a warning about this basis set mismatch and there are small inconsistencies in the treatment of BSSE. In particular, NCIs may be described less well for such choices because of the subtle balance of gCP and D3 correction terms (which are numerically of different sign).

For the computation of thermodynamic properties, we propose to use HSE-3c frequencies scaled by a factor of 0.95. The scaling was adjusted to reproduce the experimental heat capacities of ten small organic molecules (formic acid, butane, ethyne, ammonia, tetramethylsilane, benzene, acetone, and neopentane).<sup>17</sup>

#### D. Extended statistical measures

As statistical measure for a set  $\{x_1, \dots, x_n\}$  of data points with references  $\{r_1, \dots, r_n\}$  we use

- Mean deviation (MD):  $MD = \frac{1}{n} \sum_i (x_i - r_i)$
- Mean absolute deviation (MAD):  $MAD = \frac{1}{n} \sum_i |x_i - r_i|$
- Standard deviation (SD):  $SD = \sqrt{\frac{1}{n-1} \sum_i (x_i - r_i - MD)^2}$
- Maximum absolute deviation (MAX):  $MAX = \max \{|x_i - r_i|\}$

TABLE S3. MD, MAD, SD, and MAX of the methods HSE-3c, PBEh-3c, and HSE06/mSVP for the benchmark sets LMGB35, HMGB11, and TMC32. As perspective for converged basis sets, we give TPSS-D3/def2-QZVP and PBE0-D3/def2-QZVP results.

|                                                     | def2-mSVP |         |       | def2-QZVP |         |
|-----------------------------------------------------|-----------|---------|-------|-----------|---------|
|                                                     | HSE-3c    | PBEh-3c | HSE06 | TPSS-D3   | PBE0-D3 |
| <b>LMGB35</b> [pm]                                  |           |         |       |           |         |
| Structures and reference from ref. <sup>4</sup>     |           |         |       |           |         |
| MD                                                  | -0.3      | -0.6    | 0.7   | 0.7       | -0.6    |
| MAD                                                 | 0.9       | 0.9     | 1.1   | 0.8       | 0.9     |
| SD                                                  | 1.6       | 1.5     | 1.3   | 0.6       | 1.3     |
| MAX                                                 | 6.9       | 5.3     | 6.3   | 3.0       | 4.5     |
| <b>HMGB11</b> [pm]                                  |           |         |       |           |         |
| Structures and reference from ref. <sup>4</sup>     |           |         |       |           |         |
| MD                                                  | 0.3       | -0.2    | 0.1   | 1.7       | -0.3    |
| MAD                                                 | 0.9       | 0.8     | 0.9   | 1.8       | 1.0     |
| SD                                                  | 1.3       | 1.2     | 1.4   | 1.3       | 1.2     |
| MAX                                                 | 2.4       | 2.2     | 3.2   | 3.6       | 2.2     |
| <b>TMC32</b> [pm]                                   |           |         |       |           |         |
| Structures and reference from ref. <sup>18</sup>    |           |         |       |           |         |
| MD                                                  | -3.1      | -2.7    | -2.6  | -0.3      | -0.5    |
| MAD                                                 | 3.5       | 3.3     | 2.8   | 1.8       | 1.4     |
| SD                                                  | 2.6       | 2.7     | 1.9   | 3.0       | 1.9     |
| MAX                                                 | 7.5       | 10.5    | 6.5   | 12.6      | 7.0     |
| <b>ROT34</b> [%]                                    |           |         |       |           |         |
| Structures and reference from ref. <sup>19,20</sup> |           |         |       |           |         |
| MD                                                  | -0.2      | 0.2     | -0.4  | 1.2       | -0.1    |
| MAD                                                 | 0.4       | 0.4     | 0.6   | 1.2       | 0.3     |
| SD                                                  | 0.5       | 0.5     | 0.6   | 0.5       | 0.3     |
| MAX                                                 | 1.3       | 1.2     | 1.6   | 3.2       | 0.9     |



TABLE S4. MD, MAD, SD, and MAX of the methods HSE-3c, PBEh-3c, and HSE06/mSVP for the benchmark sets S22, L7, IDISP, ADIM6, XCONF. As perspective for converged basis sets, we give TPSS-D3/def2-QZVP and PBE0-D3/def2-QZVP results. MD > 0 denotes underbound systems.

|                                                                                                                                          | def2-mSVP |         |       | def2-QZVP |         |
|------------------------------------------------------------------------------------------------------------------------------------------|-----------|---------|-------|-----------|---------|
|                                                                                                                                          | HSE-3c    | PBEh-3c | HSE06 | TPSS-D3   | PBE0-D3 |
| <b>S22</b> [kcal/mol]                                                                                                                    |           |         |       |           |         |
| Structures from ref. <sup>21</sup> with reference energies from ref. <sup>22</sup>                                                       |           |         |       |           |         |
| MD                                                                                                                                       | -0.2      | -0.1    | 0.2   | 0.0       | -0.3    |
| MAD                                                                                                                                      | 0.4       | 0.4     | 2.4   | 0.4       | 0.5     |
| SD                                                                                                                                       | 0.5       | 0.6     | 3.1   | 0.6       | 0.7     |
| MAX                                                                                                                                      | 1.4       | 1.4     | 6.0   | 1.5       | 1.8     |
| <b>L7</b> [kcal/mol]                                                                                                                     |           |         |       |           |         |
| Structures from ref. <sup>23</sup> with reference energies from ref. <sup>24</sup><br>because PBE0 data not available replaced by PW6B95 |           |         |       |           |         |
| MD                                                                                                                                       | 1.0       | 1.3     | 9.8   | 0.9       | 1.4     |
| MAD                                                                                                                                      | 1.9       | 1.8     | 10.9  | 1.1       | 1.6     |
| SD                                                                                                                                       | 2.4       | 2.2     | 8.7   | 1.2       | 1.2     |
| MAX                                                                                                                                      | 4.4       | 4.5     | 21.9  | 2.8       | 3.0     |
| <b>IDISP</b> [kcal/mol]                                                                                                                  |           |         |       |           |         |
| Structures from ref. <sup>25</sup> with reference energies from ref. <sup>26</sup>                                                       |           |         |       |           |         |
| MD                                                                                                                                       | -2.1      | -2.6    | 0.8   | 2.9       | 0.7     |
| MAD                                                                                                                                      | 2.4       | 3.0     | 6.1   | 2.9       | 1.3     |
| SD                                                                                                                                       | 2.3       | 2.9     | 7.1   | 3.4       | 1.8     |
| MAX                                                                                                                                      | 4.5       | 7.0     | 8.6   | 9.3       | 3.4     |
| <b>ADIM6</b> [kcal/mol]                                                                                                                  |           |         |       |           |         |
| Structures from ref. <sup>25</sup> with reference energies from ref. <sup>27</sup>                                                       |           |         |       |           |         |
| MD                                                                                                                                       | -0.2      | 0.0     | -2.4  | 0.3       | 0.1     |
| MAD                                                                                                                                      | 0.2       | 0.0     | 2.4   | 0.3       | 0.1     |
| SD                                                                                                                                       | 0.1       | 0.0     | 1.1   | 0.2       | 0.1     |
| MAX                                                                                                                                      | 0.4       | 0.1     | 3.9   | 0.6       | 0.1     |

TABLE S5. MD, MAD, SD, and MAX of the methods HSE-3c, PBEh-3c, and HSE06/mSVP for the benchmark sets PCONF, ACONF, SCONF, CYCONF, and XCONF. As perspective for converged basis sets, we give TPSS-D3/def2-QZVP and PBE0-D3/def2-QZVP results. MD > 0 denotes underbound systems.

|                                                           | <b>def2-mSVP</b> |         |       | <b>def2-QZVP</b> |         |
|-----------------------------------------------------------|------------------|---------|-------|------------------|---------|
|                                                           | HSE-3c           | PBEh-3c | HSE06 | TPSS-D3          | PBE0-D3 |
| <b>PCONF</b> [kcal/mol]                                   |                  |         |       |                  |         |
| Structures and reference energies from ref. <sup>25</sup> |                  |         |       |                  |         |
| MD                                                        | 0.2              | -0.0    | -1.4  | -1.6             | -1.3    |
| MAD                                                       | 0.8              | 0.8     | 1.4   | 1.6              | 1.3     |
| SD                                                        | 1.0              | 0.9     | 0.6   | 0.8              | 0.5     |
| MAX                                                       | 1.6              | 1.5     | 2.2   | 2.6              | 1.9     |
| <b>ACONF</b> [kcal/mol]                                   |                  |         |       |                  |         |
| Structures and reference energies from ref. <sup>25</sup> |                  |         |       |                  |         |
| MD                                                        | -0.3             | -0.3    | 0.1   | -0.1             | 0.1     |
| MAD                                                       | 0.3              | 0.3     | 0.1   | 0.1              | 0.1     |
| SD                                                        | 0.1              | 0.2     | 0.2   | 0.1              | 0.1     |
| MAX                                                       | 0.6              | 0.8     | 0.5   | 0.2              | 0.2     |
| <b>SCONF</b> [kcal/mol]                                   |                  |         |       |                  |         |
| Structures and reference energies from ref. <sup>25</sup> |                  |         |       |                  |         |
| MD                                                        | -0.5             | -0.4    | 1.3   | 0.1              | -0.2    |
| MAD                                                       | 0.5              | 0.4     | 2.9   | 0.7              | 0.3     |
| SD                                                        | 0.5              | 0.4     | 3.0   | 1.1              | 0.3     |
| MAX                                                       | 1.4              | 1.4     | 6.5   | 3.0              | 1.1     |
| <b>CYCONF</b> [kcal/mol]                                  |                  |         |       |                  |         |
| Structures and reference energies from ref. <sup>25</sup> |                  |         |       |                  |         |
| MD                                                        | 1.4              | 1.5     | 1.3   | 0.9              | 0.6     |
| MAD                                                       | 1.4              | 1.5     | 1.3   | 0.9              | 0.6     |
| SD                                                        | 0.9              | 0.9     | 0.6   | 0.8              | 0.5     |
| MAX                                                       | 2.6              | 2.8     | 2.6   | 1.6              | 1.1     |
| <b>YMPJ</b> [kcal/mol]                                    |                  |         |       |                  |         |
| Structures and reference energies from ref. <sup>28</sup> |                  |         |       |                  |         |
| MD                                                        | -0.7             | -0.7    | 0.9   | -0.0             | 0.2     |
| MAD                                                       | 1.1              | 1.1     | 1.0   | 0.5              | 0.4     |
| SD                                                        | 0.7              | 0.7     | 0.7   | 0.5              | 0.3     |
| MAX                                                       | 2.1              | 2.1     | 2.2   | 1.2              | 1.0     |

TABLE S6. M(R)D, M(R)AD, SD, and MAX of the methods HSE-3c, PBEh-3c, and HSE06/mSVP for the benchmark sets S66 and X23. As perspective for converged basis sets, we give TPSS-D3/def2-QZVP and TPSS-D3/PAW(1000eV) results.

|                                                                                    | <b>def2-mSVP</b> |         |       | <b>PAW(1000eV)</b> |
|------------------------------------------------------------------------------------|------------------|---------|-------|--------------------|
|                                                                                    | HSE-3c           | PBEh-3c | HSE06 | TPSS-D3            |
| <b>S66-CMA [%]</b>                                                                 |                  |         |       |                    |
| Structures from ref. <sup>29</sup> with reference energies from ref. <sup>30</sup> |                  |         |       |                    |
| MD                                                                                 | 0.6              | 0.8     | 0.7   | 1.4                |
| MAD                                                                                | 1.5              | 1.5     | 5.2   | 1.7                |
| SD                                                                                 | 1.8              | 1.8     | 19.8  | 1.9                |
| MAX                                                                                | 4.2              | 4.6     | 96.2  | 5.3                |
| <b>S66-INT [kcal/mol]</b>                                                          |                  |         |       |                    |
| Structures from ref. <sup>29</sup> with reference energies from ref. <sup>30</sup> |                  |         |       |                    |
| MD                                                                                 | 0.3              | 0.1     | -0.3  | 0.0                |
| MAD                                                                                | 0.5              | 0.5     | 2.2   | 0.3                |
| SD                                                                                 | 0.6              | 0.6     | 2.6   | 0.4                |
| MAX                                                                                | 2.3              | 2.1     | 6.3   | 1.3                |
| <b>X23-DENS [%]</b>                                                                |                  |         |       |                    |
| Structures and references as listed in ref. <sup>31</sup>                          |                  |         |       |                    |
| MD                                                                                 | -1.4             | -1.8    | -8.3  | -3.8               |
| MAD                                                                                | 2.6              | 2.7     | 8.4   | 3.8                |
| SD                                                                                 | 3.2              | 3.2     | 6.3   | 1.3                |
| MAX                                                                                | 7.8              | 10.2    | 17.9  | 5.5                |
| <b>X23-INT [kcal/mol]</b>                                                          |                  |         |       |                    |
| Structures and references as listed in ref. <sup>31</sup>                          |                  |         |       |                    |
| MD                                                                                 | 0.3              | 0.1     | -3.8  | 1.0                |
| MAD                                                                                | 1.3              | 1.3     | 4.9   | 1.1                |
| SD                                                                                 | 1.6              | 1.7     | 5.9   | 0.7                |
| MAX                                                                                | 3.8              | 3.7     | 19.9  | 2.3                |

## E. X23 unit cell volumes

TABLE S7: Equilibrium volumes per molecule for the X23<sup>8,32</sup> test set of organic solids with various method combinations in Å<sup>3</sup>. References as given in Ref. 4, TPSS values are taken from Refs. 33.

|                             | ref | HSE-3c | PBEh-3c | HSE06/mSVP | TPSS-D3/'CBS' |
|-----------------------------|-----|--------|---------|------------|---------------|
| <b>X23: vdW bonded</b>      |     |        |         |            |               |
| 1 cyclohexanedione          | 136 | 145    | 144     | 160        | 138           |
| 2 CO <sub>2</sub>           | 43  | 44     | 44      | 35         | 50            |
| 3 adamantane                | 191 | 192    | 190     | 231        | 191           |
| 4 hexamine                  | 163 | 167    | 168     | 181        | 167           |
| 5 trioxane                  | 100 | 109    | 110     | 103        | 103           |
| 6 anthracene                | 223 | 212    | —       | 259        | 218           |
| 7 naphthalene               | 166 | 166    | —       | 196        | 165           |
| 8 benzene                   | 115 | 113    | 115     | 140        | 113           |
| 9 pyracine                  | 99  | 98     | 98      | 118        | 97            |
| 10 triazine                 | 96  | 90     | 92      | 103        | 92            |
| <b>X23: hydrogen bonded</b> |     |        |         |            |               |
| 11 pyrazole                 | 86  | 88     | 88      | 101        | 87            |
| 12 imidazole                | 85  | 85     | 86      | 102        | 86            |
| 13 acetic acid              | 72  | 75     | 76      | 76         | 76            |
| 14 ammonia                  | 32  | 32     | 32      | 32         | 31            |
| 15 cyanamide                | 50  | 51     | 51      | 55         | 51            |
| 16 cytosine                 | 116 | 115    | 114     | 129        | 113           |
| 17 ethylcarbanate           | 120 | 124    | 124     | 125        | 122           |
| 18 formamide                | 55  | 57     | 57      | 58         | 56            |
| 19 oxalic acid $\alpha$     | 77  | 78     | 78      | 77         | 78            |
| 20 oxalic acid $\beta$      | 77  | 78     | 78      | 77         | 80            |

|                  |     |     |     |     |     |
|------------------|-----|-----|-----|-----|-----|
| 21 succinic acid | 119 | 125 | 126 | 124 | 123 |
| 22 uracil        | 116 | 114 | 115 | 121 | 113 |
| 23 urea          | 71  | 76  | 70  | 72  | 71  |

---



---

## F. X23 lattice energies

TABLE S8: Lattice energies for the X23<sup>8,32</sup> test sets of organic solids with various method combinations in kcal/mol. References as given in Ref. 31, TPSS values are taken from Refs. 33.

|                             | ref  | HSE-3c | PBEh-3c | HSE06/mSVP | TPSS-D3/'CBS' |
|-----------------------------|------|--------|---------|------------|---------------|
| <b>X23: vdW bonded</b>      |      |        |         |            |               |
| 1 cyclohexanedione          | 21.2 | 19.6   | 19.8    | 15.6       | 19.7          |
| 2 CO <sub>2</sub>           | 6.5  | 6.9    | 6.8     | 5.3        | 5.3           |
| 3 adamantane                | 16.6 | 14.4   | 15.9    | 2.7        | 14.9          |
| 4 hexamine                  | 20.6 | 23.1   | 22.4    | 12.9       | 19.0          |
| 5 trioxane                  | 15.9 | 14.9   | 14.1    | 12.7       | 13.2          |
| 6 anthracene                | 26.9 | 25.0   | —       | 7.1        | 24.8          |
| 7 naphthalene               | 19.5 | 19.0   | —       | 5.5        | 18.4          |
| 8 benzene                   | 13.2 | 13.2   | 12.5    | 5.3        | 12.3          |
| 9 pyracine                  | 14.7 | 16.0   | 16.0    | 9.6        | 14.9          |
| 10 triazine                 | 14.8 | 15.5   | 14.4    | 8.4        | 13.7          |
| <b>X23: hydrogen bonded</b> |      |        |         |            |               |
| 11 pyrazole                 | 18.6 | 19.7   | 19.4    | 15.4       | 18.6          |
| 12 imidazole                | 20.8 | 22.8   | 22.5    | 18.2       | 21.1          |
| 13 acetic acid              | 17.4 | 17.5   | 15.7    | 17.5       | 15.8          |
| 14 ammonia                  | 8.9  | 12.7   | 12.6    | 12.6       | 9.2           |
| 15 cyanamide                | 19.1 | 22.2   | 21.8    | 19.8       | 21.2          |
| 16 cytosine                 | 38.6 | 38.6   | 36.5    | 34.3       | 36.7          |
| 17 ethylcarbanate           | 20.6 | 20.0   | 19.7    | 19.2       | 20.0          |
| 18 formamide                | 18.9 | 19.0   | 18.8    | 20.6       | 19.2          |
| 19 oxalic acid $\alpha$     | 23.0 | 24.6   | 24.1    | 24.4       | 21.3          |
| 20 oxalic acid $\beta$      | 23.0 | 24.2   | 24.1    | 24.2       | 22.1          |

|                  |      |      |      |      |      |
|------------------|------|------|------|------|------|
| 21 succinic acid | 31.1 | 29.2 | 28.5 | 30.9 | 29.8 |
| 22 uracil        | 32.4 | 31.0 | 30.3 | 29.5 | 32.6 |
| 23 urea          | 24.5 | 24.9 | 25.2 | 28.3 | 26.0 |

---



---

## REFERENCES

- <sup>1</sup>T. M. Henderson, B. G. Janesko, and G. E. Scuseria, *J. Chem. Phys.* **128**, 194105 (2008).
- <sup>2</sup>T. M. Henderson, B. G. Janesko, and G. E. Scuseria, *J. Phys. Chem. A* **112**, 12530 (2008).
- <sup>3</sup>J. P. Perdew, K. Burke, and M. Ernzerhof, *Phys. Rev. Lett.* **77**, 3865 (1996), erratum *Phys. Rev. Lett.* **78**, 1396 (1997).
- <sup>4</sup>S. Grimme, G. Brandenburg, C. Bannwarth, and A. Hansen, *J. Chem. Phys.* **143**, 054107 (2015).
- <sup>5</sup>E. Weintraub, T. M. Henderson, and G. E. Scuseria, *J. Chem. Theory Comput.* **5**, 754 (2009).
- <sup>6</sup>R. Dovesi, R. Orlando, A. Erba, C. M. Zicovich-Wilson, B. Civalleri, S. Casassa, L. Maschio, M. Ferrabone, M. De La Pierre, P. D’Arco, Y. Noël, M. Causà, M. Rérat, and B. Kirtman, *Int. J. Quantum Chem.* **114**, 1287 (2014).
- <sup>7</sup>J. G. Brandenburg, T. Maas, and S. Grimme, *J. Chem. Phys.* **142**, 124104 (2015).
- <sup>8</sup>A. M. Reilly and A. Tkatchenko, *J. Chem. Phys.* **139**, 024705 (2013).
- <sup>9</sup>S. Grimme, J. Antony, S. Ehrlich, and H. Krieg, *J. Chem. Phys.* **132**, 154104 (2010).
- <sup>10</sup>S. Grimme, S. Ehrlich, and L. Goerigk, *J. Comput. Chem.* **32**, 1456 (2011).
- <sup>11</sup>H. Kruse and S. Grimme, *J. Chem. Phys.* **136**, 154101 (2012).
- <sup>12</sup>See <http://www.thch.uni-bonn.de/>.
- <sup>13</sup>P. E. Blöchl, *Phys. Rev. B* **50**, 17953 (1994).
- <sup>14</sup>G. Kresse and J. Joubert, *Phys. Rev. B* **59**, 1758 (1999).
- <sup>15</sup>G. Kresse and J. Hafner, *Phys. Rev. B* **47**, 558 (1993).
- <sup>16</sup>G. Kresse and J. Furthmüller, *J. Comp. Mat. Sci.* **6**, 15 (1996).
- <sup>17</sup>P. Linstrom and W. Mallard, eds., *Entropy and Heat Capacity of Organic Compounds*, NIST Chemistry WebBook, NIST Standard Reference Database Number 69 (National

- Institute of Standards and Technology, Gaithersburg MD, 2015).
- <sup>18</sup>M. Bühl and H. Kabrede, *J. Chem. Theory Comput.* **2**, 1282 (2006).
- <sup>19</sup>S. Grimme and M. Steinmetz, *Phys. Chem. Chem. Phys.* **15**, 16031 (2013).
- <sup>20</sup>T. Risthaus, M. Steinmetz, and S. Grimme, *J. Comput. Chem.* **35**, 1509 (2014).
- <sup>21</sup>P. Jurecka, J. Sponer, J. Cerny, and P. Hobza, *Phys. Chem. Chem. Phys.* **8**, 1985 (2006).
- <sup>22</sup>M. S. Marshall, L. A. Burns, and C. D. Sherrill, *J. Chem. Phys.* **135**, 194102 (2011).
- <sup>23</sup>R. Sedlak, T. Janowski, M. Pitoňák, J. Řezáč, P. Pulay, and P. Hobza, *J. Chem. Theory Comput.* **9**, 3364 (2013).
- <sup>24</sup>DLPNO-CCSD(T)/CBS\* with TCutPairs of  $10^{-5}$  Eh (published elsewhere, compare with ref.<sup>34</sup>).
- <sup>25</sup>L. Goerigk and S. Grimme, *J. Chem. Theory Comput.* **7**, 291 (2011).
- <sup>26</sup>DLPNO-CCSD(T)/CBS(aug-cc-pVTZ/aug-cc-pVQZ) with TCutPairs  $10^{-5}$  Eh (published elsewhere).
- <sup>27</sup>W1-F12 with linear extrapolation to AD6 and AD7 (published elsewhere).
- <sup>28</sup>M. K. Kesharwani, A. Karton, and J. M. L. Martin, *J. Chem. Theory Comput.* **12**, 444 (2016).
- <sup>29</sup>J. Řezáč, K. E. Riley, and P. Hobza, *J. Chem. Theory Comput.* **7**, 2427 (2011).
- <sup>30</sup>B. Brauer, M. K. Kesharwani, S. Kozuch, and J. M. L. Martin, *Phys. Chem. Chem. Phys.*, DOI: 10.1039/c6cp00688d (2016).
- <sup>31</sup>S. Grimme, A. Hansen, J. G. Brandenburg, and C. Bannwarth, *Chem. Rev.*, accepted (2016).
- <sup>32</sup>A. Otero-de-la-Roza and E. R. Johnson, *J. Chem. Phys.* **137**, 054103 (2012).
- <sup>33</sup>J. Moellmann and S. Grimme, *J. Phys. Chem. C* **118**, 7615 (2014).
- <sup>34</sup>H. Kruse, A. Mladek, K. Gkionis, A. Hansen, S. Grimme, and J. Sponer, *J. Chem. Theory Comput.* **11**, 4972 (2015).

## G. Adenine-thymine double helix structure

Geometry of Adenine-thymine double helix structure given in CRYSTAL14 format with explicit definition of eleven rotational translational symmetry operations.

```

1      1      1
0.342098975469E+02 0.000000000000E+00 0.000000000000E+00
```



0.000000000000E+00 0.500000000000E+03 0.000000000000E+00  
0.000000000000E+00 0.000000000000E+00 0.500000000000E+03

11

0.100000000000E+01 0.000000000000E+00 0.000000000000E+00  
0.000000000000E+00 0.100000000000E+01 0.000000000000E+00  
0.000000000000E+00 0.000000000000E+00 0.100000000000E+01  
0.000000000000E+00 0.000000000000E+00 0.000000000000E+00  
0.100000000000E+01 0.000000000000E+00 0.000000000000E+00  
-0.233842846846E-16 0.841253532831E+00 -0.540640817456E+00  
-0.428251199740E-16 0.540640817456E+00 0.841253532831E+00  
0.310999068607E+01 0.000000000000E+00 0.000000000000E+00  
0.100000000000E+01 0.000000000000E+00 0.000000000000E+00  
0.428251199740E-16 0.841253532831E+00 0.540640817456E+00  
0.233842846846E-16 -0.540640817456E+00 0.841253532831E+00  
0.310999068607E+02 0.000000000000E+00 0.000000000000E+00  
0.100000000000E+01 0.000000000000E+00 0.000000000000E+00  
0.933752748915E-17 -0.142314838273E+00 -0.989821441881E+00  
-0.130555693542E-15 0.989821441881E+00 -0.142314838273E+00  
0.932997205827E+01 0.000000000000E+00 0.000000000000E+00  
0.100000000000E+01 0.000000000000E+00 0.000000000000E+00  
0.130555693542E-15 -0.142314838273E+00 0.989821441881E+00  
-0.933752748915E-17 -0.989821441881E+00 -0.142314838273E+00  
0.248799254887E+02 0.000000000000E+00 0.000000000000E+00  
0.100000000000E+01 0.000000000000E+00 0.000000000000E+00  
0.102733196207E-15 -0.959492973614E+00 -0.281732556841E+00  
-0.137235483602E-15 0.281732556841E+00 -0.959492973614E+00  
0.155499534305E+02 0.000000000000E+00 0.000000000000E+00  
0.100000000000E+01 0.000000000000E+00 0.000000000000E+00  
0.137235483602E-15 -0.959492973614E+00 0.281732556841E+00  
-0.102733196207E-15 -0.281732556841E+00 -0.959492973614E+00  
0.186599441164E+02 0.000000000000E+00 0.000000000000E+00  
0.100000000000E+01 0.000000000000E+00 0.000000000000E+00  
0.147607309903E-15 -0.654860733945E+00 0.755749574354E+00  
-0.550546801835E-16 -0.755749574354E+00 -0.654860733945E+00  
0.217699348025E+02 0.000000000000E+00 0.000000000000E+00  
0.100000000000E+01 0.000000000000E+00 0.000000000000E+00  
0.550546801835E-16 -0.654860733945E+00 -0.755749574354E+00  
-0.147607309903E-15 0.755749574354E+00 -0.654860733945E+00  
0.124399627444E+02 0.000000000000E+00 0.000000000000E+00  
0.100000000000E+01 0.000000000000E+00 0.000000000000E+00  
0.914944022335E-16 0.415415013002E+00 0.909631995355E+00  
0.199033889178E-16 -0.909631995355E+00 0.415415013002E+00  
0.279899161747E+02 0.000000000000E+00 0.000000000000E+00  
0.100000000000E+01 0.000000000000E+00 0.000000000000E+00  
-0.199033889178E-16 0.415415013002E+00 -0.909631995355E+00  
-0.914944022335E-16 0.909631995355E+00 0.415415013002E+00

0.621998137215E+01 0.000000000000E+00 0.000000000000E+00

66

|    |                 |                 |                  |
|----|-----------------|-----------------|------------------|
| 15 | -1.232194380083 | 2.159369771245  | -10.282030057280 |
| 8  | -1.511527411074 | 2.891921591086  | -11.519529720344 |
| 8  | -0.092020554507 | 1.034492630088  | -10.343321875665 |
| 8  | -0.682511976823 | 3.022484496213  | -9.048144360747  |
| 6  | -1.483348313453 | 4.093973977487  | -8.557506672746  |
| 6  | -0.892266043401 | 4.580627017017  | -7.261096069979  |
| 8  | -0.955803236054 | 3.571532310220  | -6.290249725498  |
| 6  | 0.589041425125  | 5.008744521747  | -7.358854562725  |
| 8  | 0.591020768779  | 6.434296528477  | -7.388121403182  |
| 6  | 1.229717438595  | 4.350410637931  | -6.138616143148  |
| 6  | 0.039687434617  | 3.835964802781  | -5.326840704842  |
| 7  | 0.282672561686  | 2.643777039997  | -4.580072841891  |
| 6  | 0.538640505045  | 1.386420179861  | -5.071466027693  |
| 7  | 0.584055386812  | 0.472333234964  | -4.154270010871  |
| 6  | 0.356655123470  | 1.154075662865  | -2.985978327301  |
| 6  | 0.265314288012  | 0.737780465114  | -1.647610557282  |
| 7  | 0.376705616848  | -0.538675144159 | -1.284331779984  |
| 7  | 0.077731628161  | 1.688151023172  | -0.722585527333  |
| 6  | -0.059685686252 | 2.963653555300  | -1.093641029293  |
| 7  | -0.038776354285 | 3.452769971790  | -2.318794114288  |
| 6  | 0.172256592812  | 2.504767061754  | -3.222937954772  |
| 1  | 0.173532176276  | -0.816452146844 | -0.332624103991  |
| 1  | 0.356288457582  | -1.243366872300 | -1.999344886779  |
| 15 | 2.098621527483  | 1.349141578566  | 9.822114278007   |
| 8  | 3.480406308311  | 1.804266280705  | 10.049512485150  |
| 8  | 1.132022571511  | 1.447486324927  | 11.091601234048  |
| 8  | 1.282891051234  | 2.125341841552  | 8.690738094155   |
| 6  | 1.668451955472  | 3.407456145674  | 8.202580465440   |
| 6  | 0.760134409514  | 3.772443581930  | 7.057201252434   |
| 8  | 0.883863514648  | 2.849047784040  | 6.007598248003   |
| 6  | -0.749451531989 | 3.759056024146  | 7.384340571243   |
| 8  | -1.240846516189 | 4.940973007206  | 8.008914562458   |
| 6  | -1.393160050932 | 3.380396381631  | 6.044108524926   |
| 6  | -0.187666059689 | 3.124166238063  | 5.125623451089   |
| 7  | -0.326964831978 | 2.040161248165  | 4.196317303335   |
| 6  | -0.110581107591 | 2.279550923980  | 2.840927686152   |
| 8  | 0.074716888835  | 3.388144229570  | 2.395925505991   |
| 7  | -0.141913641346 | 1.161178122608  | 2.055178921543   |
| 6  | -0.388318583299 | -0.132734309943 | 2.448722849610   |
| 8  | -0.340646087880 | -1.060044393206 | 1.658516396981   |
| 6  | -0.699501142462 | -0.300608423109 | 3.861032959924   |
| 6  | -1.125721946203 | -1.644581888884 | 4.342861264981   |
| 6  | -0.633430603594 | 0.783056220445  | 4.646936586604   |
| 1  | -0.006429304210 | 1.336813460783  | 1.030454262978   |

|   |                 |                 |                  |
|---|-----------------|-----------------|------------------|
| 1 | -1.498490993377 | 4.918486422079  | -9.275221486900  |
| 1 | -2.515824763869 | 3.771122134519  | -8.393801714756  |
| 1 | -1.474863512294 | 5.458617573218  | -6.946768253792  |
| 1 | 1.051874254484  | 4.645636426687  | -8.276872150698  |
| 1 | 1.854561034280  | 3.515744124943  | -6.458859173775  |
| 1 | 1.848117750810  | 5.019368728711  | -5.548198504649  |
| 1 | -0.291928172730 | 4.588752059954  | -4.602818159485  |
| 1 | 0.683409212897  | 1.211338322707  | -6.126139310608  |
| 1 | -0.202021381287 | 3.668882511915  | -0.285478276740  |
| 1 | 1.572190525141  | 4.169186190107  | 8.980457047229   |
| 1 | 2.708796957536  | 3.394886013936  | 7.871865768386   |
| 1 | 1.071116192481  | 4.771586523924  | 6.723159642754   |
| 1 | -0.950557277729 | 2.981326086268  | 8.119922841186   |
| 1 | -2.017246356621 | 2.493439110906  | 6.155754441229   |
| 1 | -2.018801610766 | 4.166986965062  | 5.637620127634   |
| 1 | 0.025217017514  | 4.014963009564  | 4.531095325887   |
| 1 | -1.291465435248 | -1.644855420823 | 5.420468599016   |
| 1 | -2.056365890847 | -1.940478971698 | 3.856575831942   |
| 1 | -0.384546027038 | -2.408479634784 | 4.108420226760   |
| 1 | -0.840395895035 | 0.708480473929  | 5.705565336879   |
| 1 | 0.276964956776  | 0.944255812630  | -11.227937998738 |
| 1 | 1.622466105948  | 1.552473583847  | 11.913208226523  |

Geometry of Adenine-thymine double helix structure given in cif format where the cell parameter of the non-periodic directions have been formally set to 50 Å.

data\_athse3c

```
_cell_length_a      34.2099
_cell_length_b      50
_cell_length_c      50
_cell_angle_alpha   90
_cell_angle_beta    90
_cell_angle_gamma   90
```

\_symmetry\_space\_group\_name\_H-M P 1

\_symmetry\_int\_tables\_number 1

loop\_

```
_symmetry_equiv_pos_as_xyz
'x, y, z'
```

loop\_

```
_atom_site_label
_atom_site_occupancy
_atom_site_fract_x
_atom_site_fract_y
```

```

_atom_site_fract_z
_atom_site_thermal_displace_type
_atom_site_B_iso_or_equiv
_atom_site_type_symbol
H1      1.0000 0.00507 0.98367 0.99335 Biso 1.000 H
H2      1.0000 0.09598 0.98986 0.98558 Biso 1.000 H
H3      1.0000 0.91416 0.98267 0.00323 Biso 1.000 H
H4      1.0000 0.27780 0.00891 0.98478 Biso 1.000 H
H5      1.0000 0.73235 0.99574 0.01711 Biso 1.000 H
H6      1.0000 0.45962 0.01754 0.00178 Biso 1.000 H
H7      1.0000 0.55053 0.01379 0.01098 Biso 1.000 H
H8      1.0000 0.64144 0.00567 0.01670 Biso 1.000 H
H9      1.0000 0.36871 0.01572 0.99202 Biso 1.000 H
H10     1.0000 0.82325 0.98717 0.01209 Biso 1.000 H
H11     1.0000 0.18689 0.99927 0.98238 Biso 1.000 H
H12     1.0000 0.01041 0.97513 0.96001 Biso 1.000 H
H13     1.0000 0.10132 0.00070 0.95292 Biso 1.000 H
H14     1.0000 0.91951 0.95746 0.97981 Biso 1.000 H
H15     1.0000 0.28314 0.04312 0.98108 Biso 1.000 H
H16     1.0000 0.73769 0.96396 0.03030 Biso 1.000 H
H17     1.0000 0.46496 0.03513 0.03136 Biso 1.000 H
H18     1.0000 0.55587 0.01259 0.04537 Biso 1.000 H
H19     1.0000 0.64678 0.98606 0.04498 Biso 1.000 H
H20     1.0000 0.37405 0.04650 0.00739 Biso 1.000 H
H21     1.0000 0.82860 0.95330 0.00601 Biso 1.000 H
H22     1.0000 0.19223 0.02604 0.96077 Biso 1.000 H
H23     1.0000 0.99981 0.02674 0.02061 Biso 1.000 H
H24     1.0000 0.09072 0.01135 0.03179 Biso 1.000 H
H25     1.0000 0.90890 0.03363 0.00288 Biso 1.000 H
H26     1.0000 0.27254 0.97580 0.02353 Biso 1.000 H
H27     1.0000 0.72708 0.01659 0.97060 Biso 1.000 H
H28     1.0000 0.45436 0.96854 0.98776 Biso 1.000 H
H29     1.0000 0.54527 0.98015 0.97269 Biso 1.000 H
H30     1.0000 0.63618 0.99807 0.96630 Biso 1.000 H
H31     1.0000 0.36345 0.96692 0.00671 Biso 1.000 H
H32     1.0000 0.81799 0.02985 0.98424 Biso 1.000 H
H33     1.0000 0.18163 0.99236 0.03288 Biso 1.000 H
H34     1.0000 0.95620 0.09837 0.81450 Biso 1.000 H
H35     1.0000 0.04711 0.18305 0.89713 Biso 1.000 H
H36     1.0000 0.86529 0.98246 0.79076 Biso 1.000 H
H37     1.0000 0.22892 0.16962 0.12377 Biso 1.000 H
H38     1.0000 0.68347 0.80238 0.92903 Biso 1.000 H
H39     1.0000 0.41074 0.95788 0.20570 Biso 1.000 H
H40     1.0000 0.50165 0.85335 0.15028 Biso 1.000 H
H41     1.0000 0.59256 0.79539 0.04714 Biso 1.000 H
H42     1.0000 0.31983 0.07578 0.19582 Biso 1.000 H

```

|     |        |         |         |         |      |       |   |
|-----|--------|---------|---------|---------|------|-------|---|
| H43 | 1.0000 | 0.77438 | 0.87212 | 0.83346 | Biso | 1.000 | H |
| H44 | 1.0000 | 0.13802 | 0.20961 | 0.01242 | Biso | 1.000 | H |
| H45 | 1.0000 | 0.92646 | 0.07542 | 0.83212 | Biso | 1.000 | H |
| H46 | 1.0000 | 0.01737 | 0.15421 | 0.89955 | Biso | 1.000 | H |
| H47 | 1.0000 | 0.83555 | 0.97269 | 0.81800 | Biso | 1.000 | H |
| H48 | 1.0000 | 0.19919 | 0.15543 | 0.09855 | Biso | 1.000 | H |
| H49 | 1.0000 | 0.65373 | 0.82310 | 0.94924 | Biso | 1.000 | H |
| H50 | 1.0000 | 0.38100 | 0.97493 | 0.18232 | Biso | 1.000 | H |
| H51 | 1.0000 | 0.47191 | 0.88034 | 0.13983 | Biso | 1.000 | H |
| H52 | 1.0000 | 0.56282 | 0.82374 | 0.05293 | Biso | 1.000 | H |
| H53 | 1.0000 | 0.29010 | 0.07748 | 0.16694 | Biso | 1.000 | H |
| H54 | 1.0000 | 0.74464 | 0.87863 | 0.86166 | Biso | 1.000 | H |
| H55 | 1.0000 | 0.10828 | 0.18404 | 0.99887 | Biso | 1.000 | H |
| H56 | 1.0000 | 0.95689 | 0.10917 | 0.86106 | Biso | 1.000 | H |
| H57 | 1.0000 | 0.04780 | 0.16696 | 0.94214 | Biso | 1.000 | H |
| H58 | 1.0000 | 0.86598 | 0.01673 | 0.82410 | Biso | 1.000 | H |
| H59 | 1.0000 | 0.22962 | 0.12198 | 0.12783 | Biso | 1.000 | H |
| H60 | 1.0000 | 0.68416 | 0.84694 | 0.91171 | Biso | 1.000 | H |
| H61 | 1.0000 | 0.41143 | 0.93439 | 0.16406 | Biso | 1.000 | H |
| H62 | 1.0000 | 0.50234 | 0.85611 | 0.10255 | Biso | 1.000 | H |
| H63 | 1.0000 | 0.59325 | 0.82351 | 0.00848 | Biso | 1.000 | H |
| H64 | 1.0000 | 0.32052 | 0.03351 | 0.17349 | Biso | 1.000 | H |
| H65 | 1.0000 | 0.77507 | 0.91897 | 0.84298 | Biso | 1.000 | H |
| H66 | 1.0000 | 0.13871 | 0.17173 | 0.04159 | Biso | 1.000 | H |
| H67 | 1.0000 | 0.03075 | 0.09291 | 0.83446 | Biso | 1.000 | H |
| H68 | 1.0000 | 0.12166 | 0.16766 | 0.91097 | Biso | 1.000 | H |
| H69 | 1.0000 | 0.93984 | 0.98867 | 0.81051 | Biso | 1.000 | H |
| H70 | 1.0000 | 0.30347 | 0.15063 | 0.11553 | Biso | 1.000 | H |
| H71 | 1.0000 | 0.75802 | 0.82292 | 0.93159 | Biso | 1.000 | H |
| H72 | 1.0000 | 0.48529 | 0.95749 | 0.18501 | Biso | 1.000 | H |
| H73 | 1.0000 | 0.57620 | 0.86421 | 0.13266 | Biso | 1.000 | H |
| H74 | 1.0000 | 0.66711 | 0.81405 | 0.03819 | Biso | 1.000 | H |
| H75 | 1.0000 | 0.39438 | 0.06426 | 0.17862 | Biso | 1.000 | H |
| H76 | 1.0000 | 0.84893 | 0.88802 | 0.84672 | Biso | 1.000 | H |
| H77 | 1.0000 | 0.21257 | 0.18918 | 0.01575 | Biso | 1.000 | H |
| H78 | 1.0000 | 0.05421 | 0.07031 | 0.87082 | Biso | 1.000 | H |
| H79 | 1.0000 | 0.14512 | 0.12899 | 0.92934 | Biso | 1.000 | H |
| H80 | 1.0000 | 0.96330 | 0.98931 | 0.85331 | Biso | 1.000 | H |
| H81 | 1.0000 | 0.32694 | 0.11786 | 0.08798 | Biso | 1.000 | H |
| H82 | 1.0000 | 0.78148 | 0.86213 | 0.94878 | Biso | 1.000 | H |
| H83 | 1.0000 | 0.50876 | 0.96893 | 0.14375 | Biso | 1.000 | H |
| H84 | 1.0000 | 0.59967 | 0.89614 | 0.10413 | Biso | 1.000 | H |
| H85 | 1.0000 | 0.69057 | 0.85633 | 0.03145 | Biso | 1.000 | H |
| H86 | 1.0000 | 0.41785 | 0.05158 | 0.13773 | Biso | 1.000 | H |
| H87 | 1.0000 | 0.87239 | 0.91171 | 0.88238 | Biso | 1.000 | H |
| H88 | 1.0000 | 0.23603 | 0.14671 | 0.01030 | Biso | 1.000 | H |

|      |        |         |         |         |      |       |   |
|------|--------|---------|---------|---------|------|-------|---|
| H89  | 1.0000 | 0.05402 | 0.10039 | 0.88904 | Biso | 1.000 | H |
| H90  | 1.0000 | 0.14493 | 0.14444 | 0.96092 | Biso | 1.000 | H |
| H91  | 1.0000 | 0.96311 | 0.02446 | 0.85238 | Biso | 1.000 | H |
| H92  | 1.0000 | 0.32675 | 0.09555 | 0.11516 | Biso | 1.000 | H |
| H93  | 1.0000 | 0.78130 | 0.87588 | 0.91643 | Biso | 1.000 | H |
| H94  | 1.0000 | 0.50857 | 0.93494 | 0.13475 | Biso | 1.000 | H |
| H95  | 1.0000 | 0.59948 | 0.87242 | 0.07819 | Biso | 1.000 | H |
| H96  | 1.0000 | 0.69039 | 0.85040 | 0.99680 | Biso | 1.000 | H |
| H97  | 1.0000 | 0.41766 | 0.01812 | 0.14853 | Biso | 1.000 | H |
| H98  | 1.0000 | 0.87220 | 0.94077 | 0.86259 | Biso | 1.000 | H |
| H99  | 1.0000 | 0.23584 | 0.14264 | 0.04522 | Biso | 1.000 | H |
| H100 | 1.0000 | 0.99147 | 0.09178 | 0.90794 | Biso | 1.000 | H |
| H101 | 1.0000 | 0.08238 | 0.12698 | 0.97217 | Biso | 1.000 | H |
| H102 | 1.0000 | 0.90056 | 0.02744 | 0.87294 | Biso | 1.000 | H |
| H103 | 1.0000 | 0.26419 | 0.07806 | 0.10394 | Biso | 1.000 | H |
| H104 | 1.0000 | 0.71874 | 0.89582 | 0.92226 | Biso | 1.000 | H |
| H105 | 1.0000 | 0.44601 | 0.93788 | 0.11418 | Biso | 1.000 | H |
| H106 | 1.0000 | 0.53692 | 0.88601 | 0.06247 | Biso | 1.000 | H |
| H107 | 1.0000 | 0.62783 | 0.87033 | 0.99093 | Biso | 1.000 | H |
| H108 | 1.0000 | 0.35510 | 0.00947 | 0.12964 | Biso | 1.000 | H |
| H109 | 1.0000 | 0.80965 | 0.95439 | 0.87828 | Biso | 1.000 | H |
| H110 | 1.0000 | 0.17328 | 0.12186 | 0.04524 | Biso | 1.000 | H |
| H111 | 1.0000 | 0.01998 | 0.02423 | 0.87748 | Biso | 1.000 | H |
| H112 | 1.0000 | 0.11089 | 0.08662 | 0.91003 | Biso | 1.000 | H |
| H113 | 1.0000 | 0.92907 | 0.95414 | 0.88383 | Biso | 1.000 | H |
| H114 | 1.0000 | 0.29270 | 0.11783 | 0.04142 | Biso | 1.000 | H |
| H115 | 1.0000 | 0.74725 | 0.87528 | 0.99346 | Biso | 1.000 | H |
| H116 | 1.0000 | 0.47452 | 0.01127 | 0.12439 | Biso | 1.000 | H |
| H117 | 1.0000 | 0.56543 | 0.94224 | 0.11073 | Biso | 1.000 | H |
| H118 | 1.0000 | 0.65634 | 0.89154 | 0.06193 | Biso | 1.000 | H |
| H119 | 1.0000 | 0.38361 | 0.07673 | 0.09854 | Biso | 1.000 | H |
| H120 | 1.0000 | 0.83816 | 0.89861 | 0.92706 | Biso | 1.000 | H |
| H121 | 1.0000 | 0.20180 | 0.12151 | 0.97114 | Biso | 1.000 | H |
| H122 | 1.0000 | 0.99409 | 0.07338 | 0.99429 | Biso | 1.000 | H |
| H123 | 1.0000 | 0.08500 | 0.06482 | 0.03487 | Biso | 1.000 | H |
| H124 | 1.0000 | 0.90319 | 0.05864 | 0.95553 | Biso | 1.000 | H |
| H125 | 1.0000 | 0.26682 | 0.99521 | 0.07344 | Biso | 1.000 | H |
| H126 | 1.0000 | 0.72137 | 0.98391 | 0.92818 | Biso | 1.000 | H |
| H127 | 1.0000 | 0.44864 | 0.93120 | 0.02615 | Biso | 1.000 | H |
| H128 | 1.0000 | 0.53955 | 0.92799 | 0.98481 | Biso | 1.000 | H |
| H129 | 1.0000 | 0.63046 | 0.94763 | 0.94828 | Biso | 1.000 | H |
| H130 | 1.0000 | 0.35773 | 0.95626 | 0.05919 | Biso | 1.000 | H |
| H131 | 1.0000 | 0.81228 | 0.02529 | 0.93088 | Biso | 1.000 | H |
| H132 | 1.0000 | 0.17591 | 0.03568 | 0.06437 | Biso | 1.000 | H |
| H133 | 1.0000 | 0.04596 | 0.08338 | 0.17961 | Biso | 1.000 | H |
| H134 | 1.0000 | 0.13687 | 0.97304 | 0.19618 | Biso | 1.000 | H |

|      |        |         |         |         |      |       |   |
|------|--------|---------|---------|---------|------|-------|---|
| H135 | 1.0000 | 0.95505 | 0.16725 | 0.10602 | Biso | 1.000 | H |
| H136 | 1.0000 | 0.31868 | 0.81035 | 0.05697 | Biso | 1.000 | H |
| H137 | 1.0000 | 0.77323 | 0.16591 | 0.89190 | Biso | 1.000 | H |
| H138 | 1.0000 | 0.50050 | 0.86939 | 0.85116 | Biso | 1.000 | H |
| H139 | 1.0000 | 0.59141 | 0.97060 | 0.80417 | Biso | 1.000 | H |
| H140 | 1.0000 | 0.68232 | 0.08113 | 0.81936 | Biso | 1.000 | H |
| H141 | 1.0000 | 0.40959 | 0.80966 | 0.94540 | Biso | 1.000 | H |
| H142 | 1.0000 | 0.86414 | 0.19802 | 0.99876 | Biso | 1.000 | H |
| H143 | 1.0000 | 0.22778 | 0.87126 | 0.15046 | Biso | 1.000 | H |
| H144 | 1.0000 | 0.07918 | 0.06790 | 0.15744 | Biso | 1.000 | H |
| H145 | 1.0000 | 0.17009 | 0.97200 | 0.16915 | Biso | 1.000 | H |
| H146 | 1.0000 | 0.98827 | 0.14224 | 0.09574 | Biso | 1.000 | H |
| H147 | 1.0000 | 0.35191 | 0.83450 | 0.04480 | Biso | 1.000 | H |
| H148 | 1.0000 | 0.80645 | 0.14617 | 0.91039 | Biso | 1.000 | H |
| H149 | 1.0000 | 0.53373 | 0.89050 | 0.86807 | Biso | 1.000 | H |
| H150 | 1.0000 | 0.62464 | 0.97921 | 0.82981 | Biso | 1.000 | H |
| H151 | 1.0000 | 0.71555 | 0.07452 | 0.84559 | Biso | 1.000 | H |
| H152 | 1.0000 | 0.44282 | 0.83655 | 0.94821 | Biso | 1.000 | H |
| H153 | 1.0000 | 0.89736 | 0.17142 | 0.00364 | Biso | 1.000 | H |
| H154 | 1.0000 | 0.26100 | 0.88500 | 0.12716 | Biso | 1.000 | H |
| H155 | 1.0000 | 0.03131 | 0.09543 | 0.13446 | Biso | 1.000 | H |
| H156 | 1.0000 | 0.12222 | 0.00759 | 0.16471 | Biso | 1.000 | H |
| H157 | 1.0000 | 0.94040 | 0.15298 | 0.06152 | Biso | 1.000 | H |
| H158 | 1.0000 | 0.30404 | 0.85332 | 0.07532 | Biso | 1.000 | H |
| H159 | 1.0000 | 0.75858 | 0.11951 | 0.88640 | Biso | 1.000 | H |
| H160 | 1.0000 | 0.48586 | 0.87055 | 0.89787 | Biso | 1.000 | H |
| H161 | 1.0000 | 0.57676 | 0.94632 | 0.84410 | Biso | 1.000 | H |
| H162 | 1.0000 | 0.66767 | 0.03913 | 0.83982 | Biso | 1.000 | H |
| H163 | 1.0000 | 0.39495 | 0.83589 | 0.98407 | Biso | 1.000 | H |
| H164 | 1.0000 | 0.84949 | 0.16196 | 0.96905 | Biso | 1.000 | H |
| H165 | 1.0000 | 0.21313 | 0.91733 | 0.14267 | Biso | 1.000 | H |
| H166 | 1.0000 | 0.97221 | 0.05963 | 0.16240 | Biso | 1.000 | H |
| H167 | 1.0000 | 0.06312 | 0.96236 | 0.16885 | Biso | 1.000 | H |
| H168 | 1.0000 | 0.88130 | 0.13796 | 0.10438 | Biso | 1.000 | H |
| H169 | 1.0000 | 0.24494 | 0.83077 | 0.03591 | Biso | 1.000 | H |
| H170 | 1.0000 | 0.69949 | 0.15226 | 0.91787 | Biso | 1.000 | H |
| H171 | 1.0000 | 0.42676 | 0.89704 | 0.86098 | Biso | 1.000 | H |
| H172 | 1.0000 | 0.51767 | 0.98854 | 0.82738 | Biso | 1.000 | H |
| H173 | 1.0000 | 0.60858 | 0.08369 | 0.84859 | Biso | 1.000 | H |
| H174 | 1.0000 | 0.33585 | 0.83822 | 0.93871 | Biso | 1.000 | H |
| H175 | 1.0000 | 0.79040 | 0.17249 | 0.01322 | Biso | 1.000 | H |
| H176 | 1.0000 | 0.15403 | 0.87705 | 0.12170 | Biso | 1.000 | H |
| H177 | 1.0000 | 0.94103 | 0.04987 | 0.12312 | Biso | 1.000 | H |
| H178 | 1.0000 | 0.03194 | 0.97539 | 0.13053 | Biso | 1.000 | H |
| H179 | 1.0000 | 0.85012 | 0.10851 | 0.07661 | Biso | 1.000 | H |
| H180 | 1.0000 | 0.21376 | 0.87104 | 0.03184 | Biso | 1.000 | H |

|      |        |         |         |         |      |       |   |
|------|--------|---------|---------|---------|------|-------|---|
| H181 | 1.0000 | 0.66831 | 0.11476 | 0.93312 | Biso | 1.000 | H |
| H182 | 1.0000 | 0.39558 | 0.91747 | 0.89592 | Biso | 1.000 | H |
| H183 | 1.0000 | 0.48649 | 0.98684 | 0.86782 | Biso | 1.000 | H |
| H184 | 1.0000 | 0.57740 | 0.06039 | 0.88169 | Biso | 1.000 | H |
| H185 | 1.0000 | 0.30467 | 0.87430 | 0.95707 | Biso | 1.000 | H |
| H186 | 1.0000 | 0.75922 | 0.13271 | 0.00578 | Biso | 1.000 | H |
| H187 | 1.0000 | 0.12285 | 0.90873 | 0.09651 | Biso | 1.000 | H |
| H188 | 1.0000 | 0.94099 | 0.08334 | 0.11275 | Biso | 1.000 | H |
| H189 | 1.0000 | 0.03190 | 0.00915 | 0.13991 | Biso | 1.000 | H |
| H190 | 1.0000 | 0.85008 | 0.13107 | 0.04980 | Biso | 1.000 | H |
| H191 | 1.0000 | 0.21372 | 0.87653 | 0.06645 | Biso | 1.000 | H |
| H192 | 1.0000 | 0.66826 | 0.09974 | 0.90146 | Biso | 1.000 | H |
| H193 | 1.0000 | 0.39553 | 0.88827 | 0.91529 | Biso | 1.000 | H |
| H194 | 1.0000 | 0.48644 | 0.95180 | 0.86834 | Biso | 1.000 | H |
| H195 | 1.0000 | 0.57735 | 0.03064 | 0.86318 | Biso | 1.000 | H |
| H196 | 1.0000 | 0.30462 | 0.86021 | 0.98915 | Biso | 1.000 | H |
| H197 | 1.0000 | 0.75917 | 0.13718 | 0.97103 | Biso | 1.000 | H |
| H198 | 1.0000 | 0.12281 | 0.93206 | 0.12265 | Biso | 1.000 | H |
| H199 | 1.0000 | 0.00074 | 0.08030 | 0.09062 | Biso | 1.000 | H |
| H200 | 1.0000 | 0.09165 | 0.01856 | 0.11965 | Biso | 1.000 | H |
| H201 | 1.0000 | 0.90983 | 0.11655 | 0.03282 | Biso | 1.000 | H |
| H202 | 1.0000 | 0.27346 | 0.89887 | 0.06659 | Biso | 1.000 | H |
| H203 | 1.0000 | 0.72801 | 0.07827 | 0.90762 | Biso | 1.000 | H |
| H204 | 1.0000 | 0.45528 | 0.89742 | 0.93567 | Biso | 1.000 | H |
| H205 | 1.0000 | 0.54619 | 0.94848 | 0.89043 | Biso | 1.000 | H |
| H206 | 1.0000 | 0.63710 | 0.01590 | 0.87997 | Biso | 1.000 | H |
| H207 | 1.0000 | 0.36437 | 0.87893 | 0.00134 | Biso | 1.000 | H |
| H208 | 1.0000 | 0.81892 | 0.11579 | 0.96460 | Biso | 1.000 | H |
| H209 | 1.0000 | 0.18256 | 0.95092 | 0.11069 | Biso | 1.000 | H |
| H210 | 1.0000 | 0.96225 | 0.96710 | 0.10841 | Biso | 1.000 | H |
| H211 | 1.0000 | 0.05316 | 0.91371 | 0.07341 | Biso | 1.000 | H |
| H212 | 1.0000 | 0.87134 | 0.03094 | 0.10899 | Biso | 1.000 | H |
| H213 | 1.0000 | 0.23498 | 0.89738 | 0.95201 | Biso | 1.000 | H |
| H214 | 1.0000 | 0.68952 | 0.11199 | 0.01713 | Biso | 1.000 | H |
| H215 | 1.0000 | 0.41679 | 0.00102 | 0.88671 | Biso | 1.000 | H |
| H216 | 1.0000 | 0.50770 | 0.06211 | 0.90525 | Biso | 1.000 | H |
| H217 | 1.0000 | 0.59861 | 0.10347 | 0.95387 | Biso | 1.000 | H |
| H218 | 1.0000 | 0.32589 | 0.93961 | 0.90414 | Biso | 1.000 | H |
| H219 | 1.0000 | 0.78043 | 0.08495 | 0.07496 | Biso | 1.000 | H |
| H220 | 1.0000 | 0.14407 | 0.88772 | 0.01511 | Biso | 1.000 | H |
| H221 | 1.0000 | 0.93989 | 0.96119 | 0.07713 | Biso | 1.000 | H |
| H222 | 1.0000 | 0.03080 | 0.92565 | 0.04391 | Biso | 1.000 | H |
| H223 | 1.0000 | 0.84898 | 0.00905 | 0.08587 | Biso | 1.000 | H |
| H224 | 1.0000 | 0.21262 | 0.92918 | 0.95061 | Biso | 1.000 | H |
| H225 | 1.0000 | 0.66716 | 0.08187 | 0.02744 | Biso | 1.000 | H |
| H226 | 1.0000 | 0.39444 | 0.01551 | 0.91506 | Biso | 1.000 | H |



|      |        |         |         |         |      |       |   |
|------|--------|---------|---------|---------|------|-------|---|
| H227 | 1.0000 | 0.48534 | 0.05897 | 0.93693 | Biso | 1.000 | H |
| H228 | 1.0000 | 0.57625 | 0.08371 | 0.97882 | Biso | 1.000 | H |
| H229 | 1.0000 | 0.30353 | 0.96712 | 0.92016 | Biso | 1.000 | H |
| H230 | 1.0000 | 0.75807 | 0.05404 | 0.06734 | Biso | 1.000 | H |
| H231 | 1.0000 | 0.12171 | 0.91372 | 0.99674 | Biso | 1.000 | H |
| H232 | 1.0000 | 0.98876 | 0.95183 | 0.08217 | Biso | 1.000 | H |
| H233 | 1.0000 | 0.07967 | 0.91505 | 0.04308 | Biso | 1.000 | H |
| H234 | 1.0000 | 0.89785 | 0.00390 | 0.09517 | Biso | 1.000 | H |
| H235 | 1.0000 | 0.26149 | 0.92552 | 0.94063 | Biso | 1.000 | H |
| H236 | 1.0000 | 0.71603 | 0.08819 | 0.03599 | Biso | 1.000 | H |
| H237 | 1.0000 | 0.44330 | 0.02307 | 0.90759 | Biso | 1.000 | H |
| H238 | 1.0000 | 0.53421 | 0.06937 | 0.93473 | Biso | 1.000 | H |
| H239 | 1.0000 | 0.62512 | 0.09364 | 0.98260 | Biso | 1.000 | H |
| H240 | 1.0000 | 0.35240 | 0.96945 | 0.90979 | Biso | 1.000 | H |
| H241 | 1.0000 | 0.80694 | 0.05473 | 0.07795 | Biso | 1.000 | H |
| H242 | 1.0000 | 0.17058 | 0.90525 | 0.99032 | Biso | 1.000 | H |
| H243 | 1.0000 | 0.97543 | 0.01417 | 0.11411 | Biso | 1.000 | H |
| H244 | 1.0000 | 0.06634 | 0.95023 | 0.10366 | Biso | 1.000 | H |
| H245 | 1.0000 | 0.88453 | 0.07361 | 0.08834 | Biso | 1.000 | H |
| H246 | 1.0000 | 0.24816 | 0.88503 | 0.99779 | Biso | 1.000 | H |
| H247 | 1.0000 | 0.70271 | 0.11093 | 0.96973 | Biso | 1.000 | H |
| H248 | 1.0000 | 0.42998 | 0.95426 | 0.89450 | Biso | 1.000 | H |
| H249 | 1.0000 | 0.52089 | 0.01855 | 0.88652 | Biso | 1.000 | H |
| H250 | 1.0000 | 0.61180 | 0.07696 | 0.91456 | Biso | 1.000 | H |
| H251 | 1.0000 | 0.33907 | 0.90448 | 0.93598 | Biso | 1.000 | H |
| H252 | 1.0000 | 0.79362 | 0.10969 | 0.03451 | Biso | 1.000 | H |
| H253 | 1.0000 | 0.15725 | 0.90209 | 0.06029 | Biso | 1.000 | H |
| H254 | 1.0000 | 0.00810 | 0.01889 | 0.77544 | Biso | 1.000 | H |
| H255 | 1.0000 | 0.09901 | 0.13729 | 0.82130 | Biso | 1.000 | H |
| H256 | 1.0000 | 0.91719 | 0.89448 | 0.80088 | Biso | 1.000 | H |
| H257 | 1.0000 | 0.28082 | 0.21959 | 0.05065 | Biso | 1.000 | H |
| H258 | 1.0000 | 0.73537 | 0.77504 | 0.01327 | Biso | 1.000 | H |
| H259 | 1.0000 | 0.46264 | 0.04515 | 0.22078 | Biso | 1.000 | H |
| H260 | 1.0000 | 0.55355 | 0.91861 | 0.21014 | Biso | 1.000 | H |
| H261 | 1.0000 | 0.64446 | 0.81792 | 0.13278 | Biso | 1.000 | H |
| H262 | 1.0000 | 0.37173 | 0.15734 | 0.16133 | Biso | 1.000 | H |
| H263 | 1.0000 | 0.82628 | 0.80358 | 0.88954 | Biso | 1.000 | H |
| H264 | 1.0000 | 0.18991 | 0.21211 | 0.92389 | Biso | 1.000 | H |
| H265 | 1.0000 | 0.04743 | 0.03105 | 0.23826 | Biso | 1.000 | H |
| H266 | 1.0000 | 0.13834 | 0.89731 | 0.21723 | Biso | 1.000 | H |
| H267 | 1.0000 | 0.95652 | 0.15494 | 0.18365 | Biso | 1.000 | H |
| H268 | 1.0000 | 0.32015 | 0.75974 | 0.99682 | Biso | 1.000 | H |
| H269 | 1.0000 | 0.77470 | 0.23142 | 0.93536 | Biso | 1.000 | H |
| H270 | 1.0000 | 0.50197 | 0.90308 | 0.78013 | Biso | 1.000 | H |
| H271 | 1.0000 | 0.59288 | 0.03734 | 0.76264 | Biso | 1.000 | H |
| H272 | 1.0000 | 0.68379 | 0.15973 | 0.82050 | Biso | 1.000 | H |

|      |        |         |         |         |      |       |   |
|------|--------|---------|---------|---------|------|-------|---|
| H273 | 1.0000 | 0.41106 | 0.79960 | 0.86744 | Biso | 1.000 | H |
| H274 | 1.0000 | 0.86561 | 0.22963 | 0.07073 | Biso | 1.000 | H |
| H275 | 1.0000 | 0.22924 | 0.79617 | 0.12722 | Biso | 1.000 | H |
| C1   | 1.0000 | 0.95664 | 0.08188 | 0.82885 | Biso | 1.000 | C |
| C2   | 1.0000 | 0.04755 | 0.16141 | 0.90029 | Biso | 1.000 | C |
| C3   | 1.0000 | 0.86573 | 0.97635 | 0.81175 | Biso | 1.000 | C |
| C4   | 1.0000 | 0.22937 | 0.15776 | 0.10540 | Biso | 1.000 | C |
| C5   | 1.0000 | 0.68391 | 0.81894 | 0.94331 | Biso | 1.000 | C |
| C6   | 1.0000 | 0.41119 | 0.96966 | 0.18729 | Biso | 1.000 | C |
| C7   | 1.0000 | 0.50209 | 0.87322 | 0.14115 | Biso | 1.000 | C |
| C8   | 1.0000 | 0.59300 | 0.81703 | 0.05020 | Biso | 1.000 | C |
| C9   | 1.0000 | 0.32028 | 0.07573 | 0.17396 | Biso | 1.000 | C |
| C10  | 1.0000 | 0.77482 | 0.87833 | 0.85442 | Biso | 1.000 | C |
| C11  | 1.0000 | 0.13846 | 0.18970 | 0.00338 | Biso | 1.000 | C |
| C12  | 1.0000 | 0.97392 | 0.09161 | 0.85478 | Biso | 1.000 | C |
| C13  | 1.0000 | 0.06483 | 0.15558 | 0.92736 | Biso | 1.000 | C |
| C14  | 1.0000 | 0.88301 | 0.99856 | 0.82830 | Biso | 1.000 | C |
| C15  | 1.0000 | 0.24665 | 0.13071 | 0.11135 | Biso | 1.000 | C |
| C16  | 1.0000 | 0.70119 | 0.84322 | 0.92999 | Biso | 1.000 | C |
| C17  | 1.0000 | 0.42846 | 0.95301 | 0.16515 | Biso | 1.000 | C |
| C18  | 1.0000 | 0.51937 | 0.87118 | 0.11353 | Biso | 1.000 | C |
| C19  | 1.0000 | 0.61028 | 0.83026 | 0.02586 | Biso | 1.000 | C |
| C20  | 1.0000 | 0.33755 | 0.04976 | 0.16434 | Biso | 1.000 | C |
| C21  | 1.0000 | 0.79210 | 0.90596 | 0.85634 | Biso | 1.000 | C |
| C22  | 1.0000 | 0.15574 | 0.17016 | 0.02301 | Biso | 1.000 | C |
| C23  | 1.0000 | 0.01722 | 0.10017 | 0.85282 | Biso | 1.000 | C |
| C24  | 1.0000 | 0.10813 | 0.16384 | 0.93035 | Biso | 1.000 | C |
| C25  | 1.0000 | 0.92631 | 0.00470 | 0.82203 | Biso | 1.000 | C |
| C26  | 1.0000 | 0.28995 | 0.13142 | 0.12010 | Biso | 1.000 | C |
| C27  | 1.0000 | 0.74449 | 0.84006 | 0.92179 | Biso | 1.000 | C |
| C28  | 1.0000 | 0.47176 | 0.94535 | 0.16944 | Biso | 1.000 | C |
| C29  | 1.0000 | 0.56267 | 0.86242 | 0.11299 | Biso | 1.000 | C |
| C30  | 1.0000 | 0.65358 | 0.82317 | 0.02067 | Biso | 1.000 | C |
| C31  | 1.0000 | 0.38085 | 0.04563 | 0.17209 | Biso | 1.000 | C |
| C32  | 1.0000 | 0.83540 | 0.90774 | 0.84774 | Biso | 1.000 | C |
| C33  | 1.0000 | 0.19904 | 0.17549 | 0.02998 | Biso | 1.000 | C |
| C34  | 1.0000 | 0.03595 | 0.08701 | 0.87723 | Biso | 1.000 | C |
| C35  | 1.0000 | 0.12686 | 0.13957 | 0.94376 | Biso | 1.000 | C |
| C36  | 1.0000 | 0.94504 | 0.00682 | 0.84968 | Biso | 1.000 | C |
| C37  | 1.0000 | 0.30867 | 0.10914 | 0.10359 | Biso | 1.000 | C |
| C38  | 1.0000 | 0.76322 | 0.86609 | 0.93135 | Biso | 1.000 | C |
| C39  | 1.0000 | 0.49049 | 0.95111 | 0.14231 | Biso | 1.000 | C |
| C40  | 1.0000 | 0.58140 | 0.88193 | 0.09329 | Biso | 1.000 | C |
| C41  | 1.0000 | 0.67231 | 0.85024 | 0.01464 | Biso | 1.000 | C |
| C42  | 1.0000 | 0.39958 | 0.03581 | 0.14616 | Biso | 1.000 | C |
| C43  | 1.0000 | 0.85413 | 0.92447 | 0.86985 | Biso | 1.000 | C |

|     |        |         |         |         |      |       |   |
|-----|--------|---------|---------|---------|------|-------|---|
| C44 | 1.0000 | 0.21776 | 0.14782 | 0.02814 | Biso | 1.000 | C |
| C45 | 1.0000 | 0.00116 | 0.07672 | 0.89346 | Biso | 1.000 | C |
| C46 | 1.0000 | 0.09207 | 0.12214 | 0.95185 | Biso | 1.000 | C |
| C47 | 1.0000 | 0.91025 | 0.00694 | 0.86890 | Biso | 1.000 | C |
| C48 | 1.0000 | 0.27389 | 0.09453 | 0.09110 | Biso | 1.000 | C |
| C49 | 1.0000 | 0.72843 | 0.88363 | 0.93922 | Biso | 1.000 | C |
| C50 | 1.0000 | 0.45571 | 0.95640 | 0.12384 | Biso | 1.000 | C |
| C51 | 1.0000 | 0.54661 | 0.89637 | 0.08061 | Biso | 1.000 | C |
| C52 | 1.0000 | 0.63752 | 0.86924 | 0.01179 | Biso | 1.000 | C |
| C53 | 1.0000 | 0.36480 | 0.03027 | 0.12775 | Biso | 1.000 | C |
| C54 | 1.0000 | 0.81934 | 0.93496 | 0.88596 | Biso | 1.000 | C |
| C55 | 1.0000 | 0.18298 | 0.12878 | 0.02553 | Biso | 1.000 | C |
| C56 | 1.0000 | 0.01575 | 0.02773 | 0.89857 | Biso | 1.000 | C |
| C57 | 1.0000 | 0.10665 | 0.07816 | 0.92966 | Biso | 1.000 | C |
| C58 | 1.0000 | 0.92484 | 0.96849 | 0.89968 | Biso | 1.000 | C |
| C59 | 1.0000 | 0.28847 | 0.09645 | 0.04188 | Biso | 1.000 | C |
| C60 | 1.0000 | 0.74302 | 0.89566 | 0.98699 | Biso | 1.000 | C |
| C61 | 1.0000 | 0.47029 | 0.00197 | 0.10513 | Biso | 1.000 | C |
| C62 | 1.0000 | 0.56120 | 0.94482 | 0.08951 | Biso | 1.000 | C |
| C63 | 1.0000 | 0.65211 | 0.90519 | 0.04547 | Biso | 1.000 | C |
| C64 | 1.0000 | 0.37938 | 0.05850 | 0.08738 | Biso | 1.000 | C |
| C65 | 1.0000 | 0.83393 | 0.91926 | 0.93264 | Biso | 1.000 | C |
| C66 | 1.0000 | 0.19756 | 0.10378 | 0.98309 | Biso | 1.000 | C |
| C67 | 1.0000 | 0.01043 | 0.02308 | 0.94028 | Biso | 1.000 | C |
| C68 | 1.0000 | 0.10133 | 0.05170 | 0.96224 | Biso | 1.000 | C |
| C69 | 1.0000 | 0.91952 | 0.98713 | 0.93728 | Biso | 1.000 | C |
| C70 | 1.0000 | 0.28315 | 0.05583 | 0.03135 | Biso | 1.000 | C |
| C71 | 1.0000 | 0.73770 | 0.93760 | 0.98565 | Biso | 1.000 | C |
| C72 | 1.0000 | 0.46497 | 0.99468 | 0.06380 | Biso | 1.000 | C |
| C73 | 1.0000 | 0.55588 | 0.96103 | 0.05080 | Biso | 1.000 | C |
| C74 | 1.0000 | 0.64679 | 0.93975 | 0.02166 | Biso | 1.000 | C |
| C75 | 1.0000 | 0.37406 | 0.03002 | 0.05655 | Biso | 1.000 | C |
| C76 | 1.0000 | 0.82861 | 0.95527 | 0.95420 | Biso | 1.000 | C |
| C77 | 1.0000 | 0.19224 | 0.06391 | 0.99619 | Biso | 1.000 | C |
| C78 | 1.0000 | 0.00776 | 0.01476 | 0.96705 | Biso | 1.000 | C |
| C79 | 1.0000 | 0.09866 | 0.03023 | 0.98026 | Biso | 1.000 | C |
| C80 | 1.0000 | 0.91685 | 0.99460 | 0.96430 | Biso | 1.000 | C |
| C81 | 1.0000 | 0.28048 | 0.03052 | 0.01930 | Biso | 1.000 | C |
| C82 | 1.0000 | 0.73503 | 0.96528 | 0.99008 | Biso | 1.000 | C |
| C83 | 1.0000 | 0.46230 | 0.99513 | 0.03577 | Biso | 1.000 | C |
| C84 | 1.0000 | 0.55321 | 0.97656 | 0.02746 | Biso | 1.000 | C |
| C85 | 1.0000 | 0.64412 | 0.96543 | 0.01043 | Biso | 1.000 | C |
| C86 | 1.0000 | 0.37139 | 0.01524 | 0.03273 | Biso | 1.000 | C |
| C87 | 1.0000 | 0.82594 | 0.97616 | 0.97289 | Biso | 1.000 | C |
| C88 | 1.0000 | 0.18957 | 0.03610 | 0.99973 | Biso | 1.000 | C |
| C89 | 1.0000 | 0.99826 | 0.05927 | 0.97813 | Biso | 1.000 | C |

|      |        |         |         |         |      |       |   |
|------|--------|---------|---------|---------|------|-------|---|
| C90  | 1.0000 | 0.08916 | 0.06169 | 0.01364 | Biso | 1.000 | C |
| C91  | 1.0000 | 0.90735 | 0.03804 | 0.94955 | Biso | 1.000 | C |
| C92  | 1.0000 | 0.27098 | 0.01321 | 0.06178 | Biso | 1.000 | C |
| C93  | 1.0000 | 0.72553 | 0.96991 | 0.94444 | Biso | 1.000 | C |
| C94  | 1.0000 | 0.45280 | 0.94929 | 0.03769 | Biso | 1.000 | C |
| C95  | 1.0000 | 0.54371 | 0.93697 | 0.00429 | Biso | 1.000 | C |
| C96  | 1.0000 | 0.63462 | 0.94465 | 0.96953 | Biso | 1.000 | C |
| C97  | 1.0000 | 0.36189 | 0.97771 | 0.05912 | Biso | 1.000 | C |
| C98  | 1.0000 | 0.81644 | 0.00473 | 0.93700 | Biso | 1.000 | C |
| C99  | 1.0000 | 0.18007 | 0.04452 | 0.04483 | Biso | 1.000 | C |
| C100 | 1.0000 | 0.00504 | 0.05010 | 0.93554 | Biso | 1.000 | C |
| C101 | 1.0000 | 0.09594 | 0.07699 | 0.97286 | Biso | 1.000 | C |
| C102 | 1.0000 | 0.91413 | 0.00729 | 0.91869 | Biso | 1.000 | C |
| C103 | 1.0000 | 0.27776 | 0.05667 | 0.05876 | Biso | 1.000 | C |
| C104 | 1.0000 | 0.73231 | 0.92907 | 0.95959 | Biso | 1.000 | C |
| C105 | 1.0000 | 0.45958 | 0.97009 | 0.07596 | Biso | 1.000 | C |
| C106 | 1.0000 | 0.55049 | 0.93377 | 0.04773 | Biso | 1.000 | C |
| C107 | 1.0000 | 0.64140 | 0.91848 | 0.00435 | Biso | 1.000 | C |
| C108 | 1.0000 | 0.36867 | 0.01591 | 0.08007 | Biso | 1.000 | C |
| C109 | 1.0000 | 0.82322 | 0.96218 | 0.92765 | Biso | 1.000 | C |
| C110 | 1.0000 | 0.18685 | 0.07944 | 0.01879 | Biso | 1.000 | C |
| C111 | 1.0000 | 0.04877 | 0.06815 | 0.16405 | Biso | 1.000 | C |
| C112 | 1.0000 | 0.13968 | 0.96864 | 0.17485 | Biso | 1.000 | C |
| C113 | 1.0000 | 0.95786 | 0.14602 | 0.10116 | Biso | 1.000 | C |
| C114 | 1.0000 | 0.32150 | 0.82792 | 0.04411 | Biso | 1.000 | C |
| C115 | 1.0000 | 0.77604 | 0.15268 | 0.90920 | Biso | 1.000 | C |
| C116 | 1.0000 | 0.50332 | 0.88839 | 0.86179 | Biso | 1.000 | C |
| C117 | 1.0000 | 0.59423 | 0.98083 | 0.82339 | Biso | 1.000 | C |
| C118 | 1.0000 | 0.68513 | 0.07935 | 0.84107 | Biso | 1.000 | C |
| C119 | 1.0000 | 0.41241 | 0.83139 | 0.94407 | Biso | 1.000 | C |
| C120 | 1.0000 | 0.86695 | 0.17754 | 0.00616 | Biso | 1.000 | C |
| C121 | 1.0000 | 0.23059 | 0.87908 | 0.13014 | Biso | 1.000 | C |
| C122 | 1.0000 | 0.02222 | 0.07545 | 0.14114 | Biso | 1.000 | C |
| C123 | 1.0000 | 0.11313 | 0.98716 | 0.15953 | Biso | 1.000 | C |
| C124 | 1.0000 | 0.93131 | 0.13978 | 0.07795 | Biso | 1.000 | C |
| C125 | 1.0000 | 0.29495 | 0.84956 | 0.05459 | Biso | 1.000 | C |
| C126 | 1.0000 | 0.74949 | 0.12897 | 0.90523 | Biso | 1.000 | C |
| C127 | 1.0000 | 0.47677 | 0.88784 | 0.88583 | Biso | 1.000 | C |
| C128 | 1.0000 | 0.56767 | 0.96737 | 0.84332 | Biso | 1.000 | C |
| C129 | 1.0000 | 0.65858 | 0.05726 | 0.85055 | Biso | 1.000 | C |
| C130 | 1.0000 | 0.38586 | 0.84392 | 0.96459 | Biso | 1.000 | C |
| C131 | 1.0000 | 0.84040 | 0.15973 | 0.99000 | Biso | 1.000 | C |
| C132 | 1.0000 | 0.20404 | 0.90295 | 0.12726 | Biso | 1.000 | C |
| C133 | 1.0000 | 0.97809 | 0.07518 | 0.14769 | Biso | 1.000 | C |
| C134 | 1.0000 | 0.06900 | 0.98340 | 0.16489 | Biso | 1.000 | C |
| C135 | 1.0000 | 0.88718 | 0.14309 | 0.08360 | Biso | 1.000 | C |

|      |        |         |         |         |      |       |   |
|------|--------|---------|---------|---------|------|-------|---|
| C136 | 1.0000 | 0.25082 | 0.84312 | 0.05340 | Biso | 1.000 | C |
| C137 | 1.0000 | 0.70537 | 0.13548 | 0.90457 | Biso | 1.000 | C |
| C138 | 1.0000 | 0.43264 | 0.88626 | 0.87948 | Biso | 1.000 | C |
| C139 | 1.0000 | 0.52355 | 0.96947 | 0.83711 | Biso | 1.000 | C |
| C140 | 1.0000 | 0.61446 | 0.06238 | 0.84647 | Biso | 1.000 | C |
| C141 | 1.0000 | 0.34173 | 0.83915 | 0.96010 | Biso | 1.000 | C |
| C142 | 1.0000 | 0.79627 | 0.16557 | 0.99296 | Biso | 1.000 | C |
| C143 | 1.0000 | 0.15991 | 0.89689 | 0.12974 | Biso | 1.000 | C |
| C144 | 1.0000 | 0.95928 | 0.06761 | 0.12088 | Biso | 1.000 | C |
| C145 | 1.0000 | 0.05019 | 0.99152 | 0.13824 | Biso | 1.000 | C |
| C146 | 1.0000 | 0.86837 | 0.12223 | 0.06514 | Biso | 1.000 | C |
| C147 | 1.0000 | 0.23200 | 0.87073 | 0.04972 | Biso | 1.000 | C |
| C148 | 1.0000 | 0.68655 | 0.11003 | 0.91588 | Biso | 1.000 | C |
| C149 | 1.0000 | 0.41382 | 0.90107 | 0.90306 | Biso | 1.000 | C |
| C150 | 1.0000 | 0.50473 | 0.96919 | 0.86497 | Biso | 1.000 | C |
| C151 | 1.0000 | 0.59564 | 0.04708 | 0.86974 | Biso | 1.000 | C |
| C152 | 1.0000 | 0.32291 | 0.86437 | 0.97193 | Biso | 1.000 | C |
| C153 | 1.0000 | 0.77746 | 0.13804 | 0.98872 | Biso | 1.000 | C |
| C154 | 1.0000 | 0.14109 | 0.91813 | 0.11171 | Biso | 1.000 | C |
| C155 | 1.0000 | 0.99451 | 0.06248 | 0.10251 | Biso | 1.000 | C |
| C156 | 1.0000 | 0.08542 | 0.99714 | 0.12002 | Biso | 1.000 | C |
| C157 | 1.0000 | 0.90361 | 0.10799 | 0.05246 | Biso | 1.000 | C |
| C158 | 1.0000 | 0.26724 | 0.88964 | 0.04726 | Biso | 1.000 | C |
| C159 | 1.0000 | 0.72179 | 0.09258 | 0.92356 | Biso | 1.000 | C |
| C160 | 1.0000 | 0.44906 | 0.91117 | 0.91924 | Biso | 1.000 | C |
| C161 | 1.0000 | 0.53997 | 0.96893 | 0.88404 | Biso | 1.000 | C |
| C162 | 1.0000 | 0.63088 | 0.03656 | 0.88565 | Biso | 1.000 | C |
| C163 | 1.0000 | 0.35815 | 0.88161 | 0.98009 | Biso | 1.000 | C |
| C164 | 1.0000 | 0.81270 | 0.11921 | 0.98575 | Biso | 1.000 | C |
| C165 | 1.0000 | 0.17633 | 0.93271 | 0.09942 | Biso | 1.000 | C |
| C166 | 1.0000 | 0.99677 | 0.04559 | 0.05682 | Biso | 1.000 | C |
| C167 | 1.0000 | 0.08768 | 0.00764 | 0.07245 | Biso | 1.000 | C |
| C168 | 1.0000 | 0.90586 | 0.06907 | 0.02315 | Biso | 1.000 | C |
| C169 | 1.0000 | 0.26949 | 0.93727 | 0.03704 | Biso | 1.000 | C |
| C170 | 1.0000 | 0.72404 | 0.04975 | 0.94679 | Biso | 1.000 | C |
| C171 | 1.0000 | 0.45131 | 0.94025 | 0.95833 | Biso | 1.000 | C |
| C172 | 1.0000 | 0.54222 | 0.97226 | 0.93264 | Biso | 1.000 | C |
| C173 | 1.0000 | 0.63313 | 0.01308 | 0.92834 | Biso | 1.000 | C |
| C174 | 1.0000 | 0.36040 | 0.92720 | 0.99725 | Biso | 1.000 | C |
| C175 | 1.0000 | 0.81495 | 0.07062 | 0.98213 | Biso | 1.000 | C |
| C176 | 1.0000 | 0.17859 | 0.96726 | 0.06507 | Biso | 1.000 | C |
| C177 | 1.0000 | 0.98865 | 0.99735 | 0.04897 | Biso | 1.000 | C |
| C178 | 1.0000 | 0.07956 | 0.97129 | 0.03976 | Biso | 1.000 | C |
| C179 | 1.0000 | 0.89774 | 0.02424 | 0.04264 | Biso | 1.000 | C |
| C180 | 1.0000 | 0.26138 | 0.95190 | 0.99040 | Biso | 1.000 | C |
| C181 | 1.0000 | 0.71592 | 0.04885 | 0.99566 | Biso | 1.000 | C |

|      |        |         |         |         |      |       |   |
|------|--------|---------|---------|---------|------|-------|---|
| C182 | 1.0000 | 0.44319 | 0.98875 | 0.95226 | Biso | 1.000 | C |
| C183 | 1.0000 | 0.53410 | 0.01634 | 0.95376 | Biso | 1.000 | C |
| C184 | 1.0000 | 0.62501 | 0.03875 | 0.96993 | Biso | 1.000 | C |
| C185 | 1.0000 | 0.35229 | 0.96473 | 0.96592 | Biso | 1.000 | C |
| C186 | 1.0000 | 0.80683 | 0.04345 | 0.02276 | Biso | 1.000 | C |
| C187 | 1.0000 | 0.17047 | 0.95435 | 0.01793 | Biso | 1.000 | C |
| C188 | 1.0000 | 0.97955 | 0.99399 | 0.07722 | Biso | 1.000 | C |
| C189 | 1.0000 | 0.07046 | 0.95319 | 0.06171 | Biso | 1.000 | C |
| C190 | 1.0000 | 0.88864 | 0.03669 | 0.06821 | Biso | 1.000 | C |
| C191 | 1.0000 | 0.25228 | 0.92442 | 0.98306 | Biso | 1.000 | C |
| C192 | 1.0000 | 0.70683 | 0.07729 | 0.99496 | Biso | 1.000 | C |
| C193 | 1.0000 | 0.43410 | 0.98401 | 0.92421 | Biso | 1.000 | C |
| C194 | 1.0000 | 0.52501 | 0.02752 | 0.92760 | Biso | 1.000 | C |
| C195 | 1.0000 | 0.61592 | 0.06230 | 0.95397 | Biso | 1.000 | C |
| C196 | 1.0000 | 0.34319 | 0.94558 | 0.94489 | Biso | 1.000 | C |
| C197 | 1.0000 | 0.79773 | 0.06774 | 0.03755 | Biso | 1.000 | C |
| C198 | 1.0000 | 0.16137 | 0.92726 | 0.02661 | Biso | 1.000 | C |
| C199 | 1.0000 | 0.96709 | 0.96711 | 0.08686 | Biso | 1.000 | C |
| C200 | 1.0000 | 0.05800 | 0.92537 | 0.05529 | Biso | 1.000 | C |
| C201 | 1.0000 | 0.87618 | 0.01929 | 0.09085 | Biso | 1.000 | C |
| C202 | 1.0000 | 0.23982 | 0.91871 | 0.95508 | Biso | 1.000 | C |
| C203 | 1.0000 | 0.69437 | 0.09065 | 0.02020 | Biso | 1.000 | C |
| C204 | 1.0000 | 0.42164 | 0.00709 | 0.90739 | Biso | 1.000 | C |
| C205 | 1.0000 | 0.51255 | 0.05603 | 0.92593 | Biso | 1.000 | C |
| C206 | 1.0000 | 0.60346 | 0.08718 | 0.96798 | Biso | 1.000 | C |
| C207 | 1.0000 | 0.33073 | 0.95590 | 0.91826 | Biso | 1.000 | C |
| C208 | 1.0000 | 0.78528 | 0.06534 | 0.06600 | Biso | 1.000 | C |
| C209 | 1.0000 | 0.14891 | 0.90733 | 0.00616 | Biso | 1.000 | C |
| C210 | 1.0000 | 0.98148 | 0.01566 | 0.09294 | Biso | 1.000 | C |
| C211 | 1.0000 | 0.07239 | 0.96293 | 0.08665 | Biso | 1.000 | C |
| C212 | 1.0000 | 0.89057 | 0.06342 | 0.06972 | Biso | 1.000 | C |
| C213 | 1.0000 | 0.25421 | 0.90578 | 0.00228 | Biso | 1.000 | C |
| C214 | 1.0000 | 0.70876 | 0.08976 | 0.97127 | Biso | 1.000 | C |
| C215 | 1.0000 | 0.43603 | 0.95879 | 0.91524 | Biso | 1.000 | C |
| C216 | 1.0000 | 0.52694 | 0.01116 | 0.90641 | Biso | 1.000 | C |
| C217 | 1.0000 | 0.61785 | 0.05998 | 0.92730 | Biso | 1.000 | C |
| C218 | 1.0000 | 0.34512 | 0.91951 | 0.95097 | Biso | 1.000 | C |
| C219 | 1.0000 | 0.79967 | 0.09105 | 0.02436 | Biso | 1.000 | C |
| C220 | 1.0000 | 0.16330 | 0.92197 | 0.05285 | Biso | 1.000 | C |
| N1   | 1.0000 | 0.00826 | 0.05288 | 0.90840 | Biso | 1.000 | N |
| N2   | 1.0000 | 0.09917 | 0.09401 | 0.95153 | Biso | 1.000 | N |
| N3   | 1.0000 | 0.91735 | 0.99496 | 0.89435 | Biso | 1.000 | N |
| N4   | 1.0000 | 0.28099 | 0.08314 | 0.06537 | Biso | 1.000 | N |
| N5   | 1.0000 | 0.73554 | 0.90181 | 0.96070 | Biso | 1.000 | N |
| N6   | 1.0000 | 0.46281 | 0.97507 | 0.10279 | Biso | 1.000 | N |
| N7   | 1.0000 | 0.55372 | 0.92346 | 0.07299 | Biso | 1.000 | N |

|     |        |         |         |         |      |       |   |
|-----|--------|---------|---------|---------|------|-------|---|
| N8  | 1.0000 | 0.64463 | 0.89615 | 0.02003 | Biso | 1.000 | N |
| N9  | 1.0000 | 0.37190 | 0.03460 | 0.09995 | Biso | 1.000 | N |
| N10 | 1.0000 | 0.82644 | 0.93864 | 0.91385 | Biso | 1.000 | N |
| N11 | 1.0000 | 0.19008 | 0.10529 | 0.01004 | Biso | 1.000 | N |
| N12 | 1.0000 | 0.01707 | 0.00945 | 0.91691 | Biso | 1.000 | N |
| N13 | 1.0000 | 0.10798 | 0.05287 | 0.93521 | Biso | 1.000 | N |
| N14 | 1.0000 | 0.92616 | 0.96303 | 0.92500 | Biso | 1.000 | N |
| N15 | 1.0000 | 0.28980 | 0.08090 | 0.02117 | Biso | 1.000 | N |
| N16 | 1.0000 | 0.74435 | 0.91642 | 0.00247 | Biso | 1.000 | N |
| N17 | 1.0000 | 0.47162 | 0.01434 | 0.08238 | Biso | 1.000 | N |
| N18 | 1.0000 | 0.56253 | 0.96753 | 0.07706 | Biso | 1.000 | N |
| N19 | 1.0000 | 0.65344 | 0.93102 | 0.04727 | Biso | 1.000 | N |
| N20 | 1.0000 | 0.38071 | 0.05661 | 0.06155 | Biso | 1.000 | N |
| N21 | 1.0000 | 0.83525 | 0.92835 | 0.95689 | Biso | 1.000 | N |
| N22 | 1.0000 | 0.19889 | 0.07950 | 0.97408 | Biso | 1.000 | N |
| N23 | 1.0000 | 0.01101 | 0.98923 | 0.97431 | Biso | 1.000 | N |
| N24 | 1.0000 | 0.10192 | 0.00482 | 0.97257 | Biso | 1.000 | N |
| N25 | 1.0000 | 0.92010 | 0.97705 | 0.98422 | Biso | 1.000 | N |
| N26 | 1.0000 | 0.28374 | 0.02696 | 0.99299 | Biso | 1.000 | N |
| N27 | 1.0000 | 0.73828 | 0.97611 | 0.01432 | Biso | 1.000 | N |
| N28 | 1.0000 | 0.46556 | 0.01757 | 0.02161 | Biso | 1.000 | N |
| N29 | 1.0000 | 0.55647 | 0.00310 | 0.02768 | Biso | 1.000 | N |
| N30 | 1.0000 | 0.64738 | 0.98764 | 0.02496 | Biso | 1.000 | N |
| N31 | 1.0000 | 0.37465 | 0.02647 | 0.00868 | Biso | 1.000 | N |
| N32 | 1.0000 | 0.82919 | 0.97216 | 0.99913 | Biso | 1.000 | N |
| N33 | 1.0000 | 0.19283 | 0.01889 | 0.97953 | Biso | 1.000 | N |
| N34 | 1.0000 | 0.00227 | 0.03376 | 0.98555 | Biso | 1.000 | N |
| N35 | 1.0000 | 0.09318 | 0.03622 | 0.00610 | Biso | 1.000 | N |
| N36 | 1.0000 | 0.91136 | 0.02059 | 0.96959 | Biso | 1.000 | N |
| N37 | 1.0000 | 0.27500 | 0.00950 | 0.03548 | Biso | 1.000 | N |
| N38 | 1.0000 | 0.72954 | 0.98089 | 0.96864 | Biso | 1.000 | N |
| N39 | 1.0000 | 0.45682 | 0.97168 | 0.02338 | Biso | 1.000 | N |
| N40 | 1.0000 | 0.54773 | 0.96353 | 0.00435 | Biso | 1.000 | N |
| N41 | 1.0000 | 0.63864 | 0.96697 | 0.98395 | Biso | 1.000 | N |
| N42 | 1.0000 | 0.36591 | 0.98881 | 0.03498 | Biso | 1.000 | N |
| N43 | 1.0000 | 0.82045 | 0.00088 | 0.96328 | Biso | 1.000 | N |
| N44 | 1.0000 | 0.18409 | 0.02717 | 0.02471 | Biso | 1.000 | N |
| N45 | 1.0000 | 0.99887 | 0.06906 | 0.95362 | Biso | 1.000 | N |
| N46 | 1.0000 | 0.08978 | 0.08317 | 0.99832 | Biso | 1.000 | N |
| N47 | 1.0000 | 0.90796 | 0.03302 | 0.92365 | Biso | 1.000 | N |
| N48 | 1.0000 | 0.27159 | 0.03608 | 0.07495 | Biso | 1.000 | N |
| N49 | 1.0000 | 0.72614 | 0.94427 | 0.93825 | Biso | 1.000 | N |
| N50 | 1.0000 | 0.45341 | 0.94681 | 0.06395 | Biso | 1.000 | N |
| N51 | 1.0000 | 0.54432 | 0.92068 | 0.02504 | Biso | 1.000 | N |
| N52 | 1.0000 | 0.63523 | 0.91973 | 0.97818 | Biso | 1.000 | N |
| N53 | 1.0000 | 0.36250 | 0.98983 | 0.08256 | Biso | 1.000 | N |

|     |        |         |         |         |      |       |   |
|-----|--------|---------|---------|---------|------|-------|---|
| N54 | 1.0000 | 0.81705 | 0.98650 | 0.91792 | Biso | 1.000 | N |
| N55 | 1.0000 | 0.18068 | 0.07087 | 0.04355 | Biso | 1.000 | N |
| N56 | 1.0000 | 0.99044 | 0.04080 | 0.08393 | Biso | 1.000 | N |
| N57 | 1.0000 | 0.08135 | 0.98895 | 0.09266 | Biso | 1.000 | N |
| N58 | 1.0000 | 0.89953 | 0.07970 | 0.04854 | Biso | 1.000 | N |
| N59 | 1.0000 | 0.26317 | 0.91112 | 0.02844 | Biso | 1.000 | N |
| N60 | 1.0000 | 0.71772 | 0.07727 | 0.94767 | Biso | 1.000 | N |
| N61 | 1.0000 | 0.44499 | 0.93720 | 0.93097 | Biso | 1.000 | N |
| N62 | 1.0000 | 0.53590 | 0.98449 | 0.90798 | Biso | 1.000 | N |
| N63 | 1.0000 | 0.62681 | 0.03671 | 0.91420 | Biso | 1.000 | N |
| N64 | 1.0000 | 0.35408 | 0.90985 | 0.97588 | Biso | 1.000 | N |
| N65 | 1.0000 | 0.80862 | 0.09329 | 0.99775 | Biso | 1.000 | N |
| N66 | 1.0000 | 0.17226 | 0.94061 | 0.07198 | Biso | 1.000 | N |
| N67 | 1.0000 | 0.99585 | 0.02322 | 0.04110 | Biso | 1.000 | N |
| N68 | 1.0000 | 0.08676 | 0.99731 | 0.04713 | Biso | 1.000 | N |
| N69 | 1.0000 | 0.90494 | 0.04176 | 0.02202 | Biso | 1.000 | N |
| N70 | 1.0000 | 0.26858 | 0.95601 | 0.01714 | Biso | 1.000 | N |
| N71 | 1.0000 | 0.72312 | 0.03738 | 0.97116 | Biso | 1.000 | N |
| N72 | 1.0000 | 0.45040 | 0.96614 | 0.96710 | Biso | 1.000 | N |
| N73 | 1.0000 | 0.54131 | 0.98930 | 0.95402 | Biso | 1.000 | N |
| N74 | 1.0000 | 0.63222 | 0.01586 | 0.95553 | Biso | 1.000 | N |
| N75 | 1.0000 | 0.35949 | 0.95373 | 0.99063 | Biso | 1.000 | N |
| N76 | 1.0000 | 0.81403 | 0.04704 | 0.99595 | Biso | 1.000 | N |
| N77 | 1.0000 | 0.17767 | 0.97226 | 0.03820 | Biso | 1.000 | N |
| O1  | 1.0000 | 0.95582 | 0.05784 | 0.76961 | Biso | 1.000 | O |
| O2  | 1.0000 | 0.04673 | 0.17322 | 0.83745 | Biso | 1.000 | O |
| O3  | 1.0000 | 0.86491 | 0.92410 | 0.77491 | Biso | 1.000 | O |
| O4  | 1.0000 | 0.22854 | 0.21981 | 0.09004 | Biso | 1.000 | O |
| O5  | 1.0000 | 0.68309 | 0.76372 | 0.97554 | Biso | 1.000 | O |
| O6  | 1.0000 | 0.41036 | 0.00941 | 0.23735 | Biso | 1.000 | O |
| O7  | 1.0000 | 0.50127 | 0.87960 | 0.20476 | Biso | 1.000 | O |
| O8  | 1.0000 | 0.59218 | 0.78801 | 0.10716 | Biso | 1.000 | O |
| O9  | 1.0000 | 0.31945 | 0.13624 | 0.19459 | Biso | 1.000 | O |
| O10 | 1.0000 | 0.77400 | 0.81446 | 0.85168 | Biso | 1.000 | O |
| O11 | 1.0000 | 0.13763 | 0.23360 | 0.95690 | Biso | 1.000 | O |
| O12 | 1.0000 | 0.99731 | 0.02069 | 0.79313 | Biso | 1.000 | O |
| O13 | 1.0000 | 0.08822 | 0.12925 | 0.83716 | Biso | 1.000 | O |
| O14 | 1.0000 | 0.90640 | 0.90556 | 0.81479 | Biso | 1.000 | O |
| O15 | 1.0000 | 0.27004 | 0.20182 | 0.04992 | Biso | 1.000 | O |
| O16 | 1.0000 | 0.72458 | 0.79229 | 0.00896 | Biso | 1.000 | O |
| O17 | 1.0000 | 0.45186 | 0.03843 | 0.20432 | Biso | 1.000 | O |
| O18 | 1.0000 | 0.54276 | 0.92187 | 0.19266 | Biso | 1.000 | O |
| O19 | 1.0000 | 0.63367 | 0.83011 | 0.11983 | Biso | 1.000 | O |
| O20 | 1.0000 | 0.36095 | 0.14279 | 0.15111 | Biso | 1.000 | O |
| O21 | 1.0000 | 0.81549 | 0.82042 | 0.89524 | Biso | 1.000 | O |
| O22 | 1.0000 | 0.17913 | 0.19677 | 0.93288 | Biso | 1.000 | O |



|     |        |         |         |         |      |       |   |
|-----|--------|---------|---------|---------|------|-------|---|
| O23 | 1.0000 | 0.98005 | 0.06045 | 0.81904 | Biso | 1.000 | O |
| O24 | 1.0000 | 0.07096 | 0.14869 | 0.88045 | Biso | 1.000 | O |
| O25 | 1.0000 | 0.88914 | 0.95302 | 0.81508 | Biso | 1.000 | O |
| O26 | 1.0000 | 0.25278 | 0.17052 | 0.08559 | Biso | 1.000 | O |
| O27 | 1.0000 | 0.70732 | 0.81228 | 0.96592 | Biso | 1.000 | O |
| O28 | 1.0000 | 0.43459 | 0.99298 | 0.19066 | Biso | 1.000 | O |
| O29 | 1.0000 | 0.52550 | 0.89102 | 0.15660 | Biso | 1.000 | O |
| O30 | 1.0000 | 0.61641 | 0.82365 | 0.07282 | Biso | 1.000 | O |
| O31 | 1.0000 | 0.34369 | 0.09718 | 0.16419 | Biso | 1.000 | O |
| O32 | 1.0000 | 0.79823 | 0.86050 | 0.86984 | Biso | 1.000 | O |
| O33 | 1.0000 | 0.16187 | 0.18972 | 0.97981 | Biso | 1.000 | O |
| O34 | 1.0000 | 0.97206 | 0.07143 | 0.87420 | Biso | 1.000 | O |
| O35 | 1.0000 | 0.06297 | 0.12811 | 0.93278 | Biso | 1.000 | O |
| O36 | 1.0000 | 0.88115 | 0.99208 | 0.85555 | Biso | 1.000 | O |
| O37 | 1.0000 | 0.24479 | 0.11436 | 0.08861 | Biso | 1.000 | O |
| O38 | 1.0000 | 0.69933 | 0.86531 | 0.94720 | Biso | 1.000 | O |
| O39 | 1.0000 | 0.42661 | 0.96691 | 0.14083 | Biso | 1.000 | O |
| O40 | 1.0000 | 0.51752 | 0.89602 | 0.10058 | Biso | 1.000 | O |
| O41 | 1.0000 | 0.60842 | 0.85815 | 0.02840 | Biso | 1.000 | O |
| O42 | 1.0000 | 0.33570 | 0.04830 | 0.13637 | Biso | 1.000 | O |
| O43 | 1.0000 | 0.79024 | 0.91524 | 0.88276 | Biso | 1.000 | O |
| O44 | 1.0000 | 0.15388 | 0.14411 | 0.01271 | Biso | 1.000 | O |
| O45 | 1.0000 | 0.01728 | 0.12869 | 0.85224 | Biso | 1.000 | O |
| O46 | 1.0000 | 0.10819 | 0.18814 | 0.94527 | Biso | 1.000 | O |
| O47 | 1.0000 | 0.92637 | 0.02837 | 0.80612 | Biso | 1.000 | O |
| O48 | 1.0000 | 0.29000 | 0.12794 | 0.14840 | Biso | 1.000 | O |
| O49 | 1.0000 | 0.74455 | 0.83543 | 0.89365 | Biso | 1.000 | O |
| O50 | 1.0000 | 0.47182 | 0.91816 | 0.17803 | Biso | 1.000 | O |
| O51 | 1.0000 | 0.56273 | 0.83490 | 0.10552 | Biso | 1.000 | O |
| O52 | 1.0000 | 0.65364 | 0.80406 | 0.99951 | Biso | 1.000 | O |
| O53 | 1.0000 | 0.38091 | 0.02740 | 0.19402 | Biso | 1.000 | O |
| O54 | 1.0000 | 0.83546 | 0.91905 | 0.82156 | Biso | 1.000 | O |
| O55 | 1.0000 | 0.19909 | 0.18787 | 0.05567 | Biso | 1.000 | O |
| O56 | 1.0000 | 0.10174 | 0.03609 | 0.20099 | Biso | 1.000 | O |
| O57 | 1.0000 | 0.19265 | 0.92169 | 0.18859 | Biso | 1.000 | O |
| O58 | 1.0000 | 0.01083 | 0.13902 | 0.14957 | Biso | 1.000 | O |
| O59 | 1.0000 | 0.37446 | 0.79592 | 0.00711 | Biso | 1.000 | O |
| O60 | 1.0000 | 0.82901 | 0.19381 | 0.93568 | Biso | 1.000 | O |
| O61 | 1.0000 | 0.55628 | 0.90875 | 0.81732 | Biso | 1.000 | O |
| O62 | 1.0000 | 0.64719 | 0.02200 | 0.79698 | Biso | 1.000 | O |
| O63 | 1.0000 | 0.73810 | 0.12827 | 0.84111 | Biso | 1.000 | O |
| O64 | 1.0000 | 0.46537 | 0.82447 | 0.89565 | Biso | 1.000 | O |
| O65 | 1.0000 | 0.91992 | 0.19782 | 0.05067 | Biso | 1.000 | O |
| O66 | 1.0000 | 0.28356 | 0.83216 | 0.11632 | Biso | 1.000 | O |
| O67 | 1.0000 | 0.03309 | 0.02895 | 0.22183 | Biso | 1.000 | O |
| O68 | 1.0000 | 0.12400 | 0.90442 | 0.20227 | Biso | 1.000 | O |

|      |        |         |         |         |      |       |   |
|------|--------|---------|---------|---------|------|-------|---|
| O69  | 1.0000 | 0.94218 | 0.14429 | 0.17097 | Biso | 1.000 | O |
| O70  | 1.0000 | 0.30582 | 0.77631 | 0.99709 | Biso | 1.000 | O |
| O71  | 1.0000 | 0.76036 | 0.21545 | 0.93977 | Biso | 1.000 | O |
| O72  | 1.0000 | 0.48764 | 0.90973 | 0.79531 | Biso | 1.000 | O |
| O73  | 1.0000 | 0.57855 | 0.03472 | 0.77900 | Biso | 1.000 | O |
| O74  | 1.0000 | 0.66945 | 0.14869 | 0.83285 | Biso | 1.000 | O |
| O75  | 1.0000 | 0.39673 | 0.81339 | 0.87661 | Biso | 1.000 | O |
| O76  | 1.0000 | 0.85127 | 0.21381 | 0.06582 | Biso | 1.000 | O |
| O77  | 1.0000 | 0.21491 | 0.81024 | 0.11849 | Biso | 1.000 | O |
| O78  | 1.0000 | 0.03750 | 0.04251 | 0.17381 | Biso | 1.000 | O |
| O79  | 1.0000 | 0.12841 | 0.94179 | 0.16920 | Biso | 1.000 | O |
| O80  | 1.0000 | 0.94659 | 0.12973 | 0.12324 | Biso | 1.000 | O |
| O81  | 1.0000 | 0.31023 | 0.82191 | 0.01734 | Biso | 1.000 | O |
| O82  | 1.0000 | 0.76477 | 0.16600 | 0.93319 | Biso | 1.000 | O |
| O83  | 1.0000 | 0.49205 | 0.91025 | 0.84520 | Biso | 1.000 | O |
| O84  | 1.0000 | 0.58296 | 0.00818 | 0.82125 | Biso | 1.000 | O |
| O85  | 1.0000 | 0.67386 | 0.10352 | 0.85405 | Biso | 1.000 | O |
| O86  | 1.0000 | 0.40114 | 0.84080 | 0.91830 | Biso | 1.000 | O |
| O87  | 1.0000 | 0.85568 | 0.17577 | 0.03354 | Biso | 1.000 | O |
| O88  | 1.0000 | 0.21932 | 0.85955 | 0.11087 | Biso | 1.000 | O |
| O89  | 1.0000 | 0.02584 | 0.05698 | 0.12015 | Biso | 1.000 | O |
| O90  | 1.0000 | 0.11675 | 0.98298 | 0.13188 | Biso | 1.000 | O |
| O91  | 1.0000 | 0.93493 | 0.11289 | 0.07027 | Biso | 1.000 | O |
| O92  | 1.0000 | 0.29856 | 0.87296 | 0.03930 | Biso | 1.000 | O |
| O93  | 1.0000 | 0.75311 | 0.11082 | 0.92650 | Biso | 1.000 | O |
| O94  | 1.0000 | 0.48038 | 0.91148 | 0.90077 | Biso | 1.000 | O |
| O95  | 1.0000 | 0.57129 | 0.97918 | 0.86866 | Biso | 1.000 | O |
| O96  | 1.0000 | 0.66220 | 0.05349 | 0.87825 | Biso | 1.000 | O |
| O97  | 1.0000 | 0.38947 | 0.87188 | 0.96438 | Biso | 1.000 | O |
| O98  | 1.0000 | 0.84402 | 0.13296 | 0.99808 | Biso | 1.000 | O |
| O99  | 1.0000 | 0.20765 | 0.91438 | 0.10174 | Biso | 1.000 | O |
| O100 | 1.0000 | 0.96373 | 0.09882 | 0.16018 | Biso | 1.000 | O |
| O101 | 1.0000 | 0.05464 | 0.99653 | 0.18818 | Biso | 1.000 | O |
| O102 | 1.0000 | 0.87282 | 0.16973 | 0.08132 | Biso | 1.000 | O |
| O103 | 1.0000 | 0.23646 | 0.82739 | 0.07502 | Biso | 1.000 | O |
| O104 | 1.0000 | 0.69100 | 0.14448 | 0.87939 | Biso | 1.000 | O |
| O105 | 1.0000 | 0.41827 | 0.86006 | 0.87415 | Biso | 1.000 | O |
| O106 | 1.0000 | 0.50918 | 0.95031 | 0.81847 | Biso | 1.000 | O |
| O107 | 1.0000 | 0.60009 | 0.05634 | 0.82042 | Biso | 1.000 | O |
| O108 | 1.0000 | 0.32736 | 0.81423 | 0.96979 | Biso | 1.000 | O |
| O109 | 1.0000 | 0.78191 | 0.18675 | 0.97665 | Biso | 1.000 | O |
| O110 | 1.0000 | 0.14555 | 0.89535 | 0.15643 | Biso | 1.000 | O |
| O111 | 1.0000 | 0.00218 | 0.06776 | 0.04792 | Biso | 1.000 | O |
| O112 | 1.0000 | 0.09309 | 0.03110 | 0.07695 | Biso | 1.000 | O |
| O113 | 1.0000 | 0.91127 | 0.08291 | 0.00368 | Biso | 1.000 | O |
| O114 | 1.0000 | 0.27491 | 0.94293 | 0.06025 | Biso | 1.000 | O |

|      |        |         |         |         |      |       |   |
|------|--------|---------|---------|---------|------|-------|---|
| O115 | 1.0000 | 0.72946 | 0.03779 | 0.92611 | Biso | 1.000 | O |
| O116 | 1.0000 | 0.45673 | 0.92148 | 0.97311 | Biso | 1.000 | O |
| O117 | 1.0000 | 0.54764 | 0.94848 | 0.93493 | Biso | 1.000 | O |
| O118 | 1.0000 | 0.63855 | 0.99184 | 0.91741 | Biso | 1.000 | O |
| O119 | 1.0000 | 0.36582 | 0.91941 | 0.01983 | Biso | 1.000 | O |
| O120 | 1.0000 | 0.82037 | 0.07174 | 0.95827 | Biso | 1.000 | O |
| O121 | 1.0000 | 0.18400 | 0.98456 | 0.08155 | Biso | 1.000 | O |
| O122 | 1.0000 | 0.99004 | 0.97880 | 0.03317 | Biso | 1.000 | O |
| O123 | 1.0000 | 0.08095 | 0.96423 | 0.01644 | Biso | 1.000 | O |
| O124 | 1.0000 | 0.89913 | 0.00010 | 0.03937 | Biso | 1.000 | O |
| O125 | 1.0000 | 0.26277 | 0.97018 | 0.97429 | Biso | 1.000 | O |
| O126 | 1.0000 | 0.71732 | 0.03585 | 0.01626 | Biso | 1.000 | O |
| O127 | 1.0000 | 0.44459 | 0.01100 | 0.96220 | Biso | 1.000 | O |
| O128 | 1.0000 | 0.53550 | 0.02969 | 0.97415 | Biso | 1.000 | O |
| O129 | 1.0000 | 0.62641 | 0.03895 | 0.99430 | Biso | 1.000 | O |
| O130 | 1.0000 | 0.35368 | 0.98882 | 0.96226 | Biso | 1.000 | O |
| O131 | 1.0000 | 0.80822 | 0.02137 | 0.03306 | Biso | 1.000 | O |
| O132 | 1.0000 | 0.17186 | 0.96102 | 0.99449 | Biso | 1.000 | O |
| P1   | 1.0000 | 0.96398 | 0.04319 | 0.79436 | Biso | 1.000 | P |
| P2   | 1.0000 | 0.05489 | 0.14751 | 0.85035 | Biso | 1.000 | P |
| P3   | 1.0000 | 0.87307 | 0.92515 | 0.80366 | Biso | 1.000 | P |
| P4   | 1.0000 | 0.23671 | 0.19740 | 0.07201 | Biso | 1.000 | P |
| P5   | 1.0000 | 0.69125 | 0.79031 | 0.98652 | Biso | 1.000 | P |
| P6   | 1.0000 | 0.41853 | 0.01650 | 0.20948 | Biso | 1.000 | P |
| P7   | 1.0000 | 0.50944 | 0.90063 | 0.18514 | Biso | 1.000 | P |
| P8   | 1.0000 | 0.60034 | 0.81631 | 0.10203 | Biso | 1.000 | P |
| P9   | 1.0000 | 0.32762 | 0.12713 | 0.16730 | Biso | 1.000 | P |
| P10  | 1.0000 | 0.78216 | 0.83088 | 0.87529 | Biso | 1.000 | P |
| P11  | 1.0000 | 0.14580 | 0.20500 | 0.95386 | Biso | 1.000 | P |
| P12  | 1.0000 | 0.06135 | 0.02698 | 0.19644 | Biso | 1.000 | P |
| P13  | 1.0000 | 0.15225 | 0.91649 | 0.17985 | Biso | 1.000 | P |
| P14  | 1.0000 | 0.97044 | 0.12890 | 0.15067 | Biso | 1.000 | P |
| P15  | 1.0000 | 0.33407 | 0.80172 | 0.99875 | Biso | 1.000 | P |
| P16  | 1.0000 | 0.78862 | 0.19060 | 0.94534 | Biso | 1.000 | P |
| P17  | 1.0000 | 0.51589 | 0.91877 | 0.81912 | Biso | 1.000 | P |
| P18  | 1.0000 | 0.60680 | 0.02945 | 0.80391 | Biso | 1.000 | P |
| P19  | 1.0000 | 0.69771 | 0.13079 | 0.85097 | Biso | 1.000 | P |
| P20  | 1.0000 | 0.42498 | 0.83387 | 0.89175 | Biso | 1.000 | P |
| P21  | 1.0000 | 0.87953 | 0.18990 | 0.05706 | Biso | 1.000 | P |
| P22  | 1.0000 | 0.24316 | 0.83252 | 0.10615 | Biso | 1.000 | P |
